# Supplementary material for: Control of Bacterial Phenotype and Chromosomal Gene Expression by Single Plasmids of Lactococcus lactis IL594
Source: MDPI journal article supplement (doi:10.3390/ijms24129877), 2023-06-08
Supplement: s1 [file s1]

# Control of bacterial phenotype and chromosomal gene expression by single plasmids of *Lactococcus lactis* IL594

Katarzyna Kosiorek<sup>1</sup>, Anna Koryszewska-Bagińska<sup>2</sup>, Marek Skoneczny<sup>1</sup>, and Tamara Aleksandrak-Piekarczyk<sup>1,\*</sup>

<sup>1</sup> Institute of Biochemistry and Biophysics, Polish Academy of Sciences (IBB PAS), Pawińskiego 5a, 02-106 Warsaw, Poland; K.K.: k.izdebska@ibb.waw.pl; M.S.: kicia@ibb.waw.pl; T.A.P.: tamara@ibb.waw.pl  
<sup>2</sup> Department of Medical Biology, Medical University of Warsaw, Litewska 14/16, 00-575 Warsaw, Poland; A.K.B.: akoryszewska@wum.edu.pl  
\* Correspondence: tamara@ibb.waw.pl; +48 592 12 13

## Supplementary Materials

**Table S1.** Differentially expressed genes within plasmid-containing *L. lactis* strains and plasmid-free derivative IL1403. A gene was identified as differentially expressed between compared *L. lactis* strains if the level of its transcript differed by  $|\text{Log2Ratio}| \geq 1.5$  with the statistical significance,  $p < 0.05$ . Differentially expressed genes were grouped based on putative functions of the encoded proteins into COG categories. In comparative transcriptomic analysis, a range of 42 to 189 changes in chromosomal genes expression caused by single-plasmid presence were detected, representing from 2% to 9% of all annotated chromosomal genes in the *L. lactis* IL1403 genome. The total number of identified unique genes reached 435.

| Gene                             | NCBI           | COG  | Gene upregulation or downregulation |        |        |        |        |                              |               |                               | Protein function |
|----------------------------------|----------------|------|-------------------------------------|--------|--------|--------|--------|------------------------------|---------------|-------------------------------|------------------|
|                                  | GeneID         |      | <i>L. lactis</i> strain             |        |        |        |        |                              |               |                               |                  |
|                                  |                |      | IL1618                              | IL1421 | IL2661 | IL1619 | IL1420 | IL1530                       | IL1392        | IL594                         |                  |
| Plasmid / plasmids               |                | pIL1 | pIL3                                | pIL4   | pIL5   | pIL6   | pIL7   | pIL1<br>pIL2<br>pIL3<br>pIL5 | pIL1-<br>pIL7 |                               |                  |
| Energy production and conversion |                |      |                                     |        |        |        |        |                              |               |                               |                  |
| <i>adhE</i>                      | WP_129881180.1 | C    |                                     |        | 3.2    |        | 1.7    | 2.1                          | 2.2           | bifunctional acetaldehyde-CoA |                  |
| <i>agl</i>                       | CP009472.1     | C    |                                     |        |        |        |        |                              | 4.8           | alpha-glucosidase             |                  |
| <i>citB</i>                      | AY268077.1     | C    |                                     | 1.8    |        | 2.0    |        | 2.3                          | 2.5           | acetate-SH-citrate lyase      |                  |
| <i>citC</i>                      | AY268077.1     | C    |                                     |        |        |        |        |                              | 2.3           | acetate-SH-citrate lyase      |                  |

|              |                |   |      |      |      |      |      |                                                                 |
|--------------|----------------|---|------|------|------|------|------|-----------------------------------------------------------------|
| <i>citD</i>  | AY268077.1     | C |      |      |      | 3.0  |      | citrate lyase subunit gamma                                     |
| <i>gltA</i>  | NC_002662.1    | C |      | 2.1  | 1.6  |      |      | citrate synthase                                                |
| <i>gltP</i>  | NC_009004.1    | C | 1.8  | 1.5  | 3.0  | 2.1  |      | glutamate ABC transporter permease                              |
| <i>gltQ</i>  | NC_002662.1    | C |      |      | 2.9  | 1.8  | 1.9  | glutamate ABC transporter ATP-binding protein                   |
| <i>gltS</i>  | NC_017486.1    | C | 1.9  | 2.3  | 3.2  | 3.0  |      | glutamate or arginine ABC transporter substrate binding protein |
| <i>ipd</i>   | NC_017486.1    | C |      | 1.6  |      |      |      | indole-3-pyruvate decarboxylase                                 |
| <i>maa</i>   | NC_020450.1    | C |      |      |      | 4.6  |      | maltose O-acetyltransferase                                     |
| <i>mleP</i>  | NC_020450.1    | C | 3.0  |      |      | 3.2  |      | malate transporter                                              |
| <i>mleS</i>  | AAK04998.1     | C | 3.0  |      |      | 2.9  |      | malate dehydrogenase                                            |
| <i>msmK</i>  | NC_017486.1    | C |      |      |      |      | -2.6 | multiple sugar ABC transporter ATP-binding protein              |
| <i>pdhB</i>  | NC_020450.1    | C |      |      |      | 2.1  |      | PDH E1 component subunit beta                                   |
| <i>pydA</i>  | NC_002662.1    | C |      | 1.8  |      |      |      | dihydroorotate dehydrogenase 1A                                 |
| <i>pyrZ</i>  | AAK05445.1     | C |      | -2.0 |      | -2.4 |      | dihydroorotate dehydrogenase electron transfer subunit          |
| <i>trxA</i>  | NZ_CP059048.1  | C | 2.6  |      |      |      |      | thioredoxin                                                     |
| <i>trxB1</i> | NZ_CP059048.1  | C | 1.8  |      |      |      |      | thioredoxin reductase                                           |
| <i>tyrS</i>  | WP_058204081.1 | C | -1.7 |      | -2.5 |      |      | tyrosyl-tRNA synthetase                                         |
| <i>ybiE</i>  | GFO78088.1     | C | 1.9  |      |      | 3.3  |      | oxidoreductase                                                  |
| <i>yddB</i>  | AAK04431.1     | C |      |      |      | 2.0  |      | oxidoreductase                                                  |
| <i>yfdE</i>  | NP_389061.1    | C | -1.8 |      |      |      |      | hypothetical protein similar to myo-inositol monophosphatases   |
| <i>yfhC</i>  | AAK04676.1     | C | 2.6  | 1.5  | 3.7  |      |      | hypothetical protein                                            |
| <i>ygaJ</i>  | NP_388758.2    | C | 2.0  |      |      |      |      | putative peptidase                                              |
| <i>yiaD</i>  | AAK04894.1     | C | 3.4  | 1.9  |      | 2.1  |      | NADH-flavin reductase                                           |
| <i>yjcA</i>  | YP_026228.1    | C | 1.7  |      |      |      |      | ABC transporter ATP-binding protein                             |
| <i>yjgC</i>  | NP_389098.1    | C |      |      |      |      | -1.5 | amino acid ABC transporter substrate binding protein            |
| <i>ylbA</i>  | NP_459521.1    | C | 1.6  |      |      |      |      | ABC transporter ATP-binding protein                             |
| <i>ymgG</i>  | NZ_CM001513.1  | C | 1.7  |      |      |      |      | hypothetical protein                                            |

|                                                            |                |   |      |     |      |     |                                         |                                |
|------------------------------------------------------------|----------------|---|------|-----|------|-----|-----------------------------------------|--------------------------------|
| <i>ymgH</i>                                                | NZ_CM001513.1  | C | 1.6  |     | 1.5  |     | hypothetical protein                    |                                |
| <i>ymgK</i>                                                | YP_009518766.1 | C | 1.5  |     | 2.4  |     | oxidoreductase                          |                                |
| <i>yobA</i>                                                | NP_416355.1    | C | 1.9  |     | 1.7  |     | hypothetical protein                    |                                |
| <i>yogA</i>                                                | NP_389725.1    | C |      |     | -1.7 |     | hypothetical protein                    |                                |
| <i>yphC</i>                                                | NP_417040.2    | C |      |     | -3.9 |     | oxidoreductase                          |                                |
| <i>yqcA</i>                                                | NP_417270.1    | C |      |     | 1.7  |     | oxidoreductase                          |                                |
| <i>yrjA</i>                                                | NZ_CP059048.1  | C | -1.5 |     |      |     | hypothetical protein                    |                                |
| <i>yrjB</i>                                                | AAK05831.1     | C | 1.6  | 1.5 | 2.0  | 1.9 | oxidoreductase                          |                                |
| <i>yrjC</i>                                                | NZ_CP059048.1  | C |      |     | 1.7  |     | iron-binding oxidase subunit            |                                |
| <i>yugB</i>                                                | NP_268143.1    | C |      |     | 2.3  |     | oxidoreductase                          |                                |
| <i>ywdA</i>                                                | NP_268313.1    | C |      |     | 1.8  |     | hypothetical protein                    |                                |
| <i>ywdC</i>                                                | NP_268315.1    | C | 1.7  |     | 1.7  |     | hypothetical protein                    |                                |
| <i>ywiD</i>                                                | AAK06296.1     | C | 2.9  |     |      |     | hypothetical protein                    |                                |
| <i>ywiH</i>                                                | AAK06302.1     | C | 2.8  | 2.2 | 1.6  | 3.3 | ABC transporter permease                |                                |
| <i>ywjF</i>                                                | NP_268372.1    | C | 1.6  |     |      |     | 3-hydroxyisobutyrate dehydrogenase      |                                |
| Cell cycle control, cell division, chromosome partitioning |                |   |      |     |      |     |                                         |                                |
| <i>ezrA</i>                                                | NC_022369.1    | D | 2.4  |     | 1.8  |     | septation ring formation regulator EzrA |                                |
| <i>scpA</i>                                                | NP_267433.1    | D |      |     | -1.6 |     | segregation and condensation protein A  |                                |
| <i>yihA</i>                                                | NP_267005.1    | D | 1.8  |     | 1.8  |     | hypothetical protein                    |                                |
| <i>yihB</i>                                                | NP_267006.1    | D | 1.7  |     | 1.6  |     | hypothetical protein                    |                                |
| Amino acid transport and metabolism                        |                |   |      |     |      |     |                                         |                                |
| <i>arcA</i>                                                | WP_004254504.1 | E | 1.8  |     | 3.0  | 2.8 | 2.5                                     | arginine deiminase             |
| <i>arcB</i>                                                | AJ001103.1     | E | 1.7  |     | 2.8  | 2.2 | 2.3                                     | ornithine carbamoyltransferase |
| <i>arcC1</i>                                               | AAK06131.1     | E |      |     | 2.7  |     |                                         | carbamate kinase               |
| <i>arcC2</i>                                               | AAK06131.1     | E | 2.6  | 1.7 | 2.6  |     |                                         | carbamate kinase               |
| <i>arcD1</i>                                               | U81991.1       | E | 1.8  |     | 3.2  | 1.9 | 2.1                                     | arginine/ornithine antiporter  |
| <i>argF</i>                                                | NC_022369.1    | E | 1.7  |     |      |     | 1.7                                     | ornithine carbamoyltransferase |

|              |             |   |      |      |      |      |      |      |                                                                                                    |
|--------------|-------------|---|------|------|------|------|------|------|----------------------------------------------------------------------------------------------------|
| <i>aroH</i>  | NC_000913.3 | E |      |      | -2.0 |      |      |      | phospho-2-dehydro-3-deoxyheptonate aldolase                                                        |
| <i>asd</i>   | NC_000913.3 | E |      |      |      |      | 2.3  |      | aspartate-semialdehyde dehydrogenase                                                               |
| <i>bmpA</i>  | AE005176.1  | E |      |      |      |      | -2.2 |      | basic membrane protein A                                                                           |
| <i>ceo</i>   | U23376.1    | E |      |      | 1.7  |      |      |      | N5-carboxyethyl-ornithine synthase                                                                 |
| <i>cysD</i>  | AAK04171.1  | E |      |      |      |      | -2.2 |      | O-acetylhomoserine sulfhydrylase                                                                   |
| <i>cysK</i>  | QOK50869.1  | E |      | -2.5 | -2.6 | -1.6 | -2.7 |      | cysteine synthase serine family                                                                    |
| <i>cysM</i>  | NC_049805.1 | E |      | -3.0 | -2.9 | -1.7 | -2.4 |      | cysteine synthase                                                                                  |
| <i>glnB</i>  | AAK05689.1  | E |      |      |      | 2.1  |      |      | nitrogen regulatory protein P-II                                                                   |
| <i>glnQ</i>  | SPS12229.1  | E |      |      |      |      |      | -1.9 | glutamine ABC transporter ATP-binding protein                                                      |
| <i>hisA</i>  | NC_022369.1 | E |      |      |      | 1.5  |      |      | 1-(5-phosphoribosyl)-5-[(5-phosphoribosylamino)methylideneamino] imidazole-4-carboxamide isomerase |
| <i>ilvD</i>  | SPS12837.1  | E |      |      |      |      | 2.2  |      | dihydroxy-acid dehydratase                                                                         |
| <i>leuC</i>  | NC_022369.1 | E |      |      |      | 1.5  |      |      | isopropylmalate isomerase large subunit dehydratase component                                      |
| <i>lysP</i>  | NC_020450.1 | E |      | 2.0  |      |      | 2.3  |      | lysine specific permease                                                                           |
| <i>mapA</i>  | NC_002662.1 | E | 2.8  |      |      |      | 5.2  |      | maltose phosphorylase                                                                              |
| <i>metB1</i> | NC_017486.1 | E | -1.5 |      |      |      |      |      | cystathionine gamma-synthase                                                                       |
| <i>metB2</i> | NC_020450.1 | E |      | -2.8 | -1.6 | -2.4 | -1.6 | -3.2 | cystathionine gamma-synthase                                                                       |
| <i>oppA</i>  | QQF01346.1  | E |      | 1.8  |      |      | 2.4  |      | oligopeptide ABC transporter substrate binding protein                                             |
| <i>oppB</i>  | QQF01347.1  | E |      | 3.2  | 7.6  |      | 3.8  | 6.4  | oligopeptide ABC transporter permease                                                              |
| <i>oppC</i>  | QQF01348.1  | E |      |      | 7.9  | 2.0  | 2.0  | 6.3  | oligopeptide ABC transporter permease                                                              |
| <i>oppD</i>  | QQF01345.1  | E |      |      | 5.9  |      |      | 5.0  | oligopeptide ABC transporter ATP binding protein                                                   |
| <i>oppF</i>  | QQE99754.1  | E |      | 1.5  | 6.9  |      | 1.8  | 5.7  | oligopeptide ABC transporter ATP binding protein                                                   |
| <i>optS</i>  | NC_002662.1 | E |      | 1.8  |      | 2.3  | 1.5  | 2.2  | oligopeptide ABC transporter substrate binding protein                                             |
| <i>pepDB</i> | NC_002662.1 | E | 1.7  |      |      |      |      |      | dipeptidase                                                                                        |
| <i>pepF</i>  | CAA83534.1  | E |      |      |      |      | 2.0  | 1.6  | oligoendopeptidase F                                                                               |
| <i>potA</i>  | NC_000913.3 | E |      |      |      |      | -1.8 |      | spermidine/putrescine ABC transporter ATP-binding protein                                          |

|                                     |                |   |      |      |      |      |      |                                                        |                                                                   |
|-------------------------------------|----------------|---|------|------|------|------|------|--------------------------------------------------------|-------------------------------------------------------------------|
| <i>poxL</i>                         | NC_009004.1    | E | 2.8  | 1.7  | 1.8  | 2.7  | 2.3  | pyruvate oxidase                                       |                                                                   |
| <i>serB</i>                         | NP_266761.1    | E |      |      | 1.6  |      |      | phosphoserine phosphatase                              |                                                                   |
| <i>ybeC</i>                         | NP_266300.1    | E | 1.9  |      |      |      | 1.6  | hypothetical protein                                   |                                                                   |
| <i>yceJ</i>                         | NP_266406.1    | E |      |      |      | 1.6  |      | hypothetical protein                                   |                                                                   |
| <i>ycjI</i>                         | WP_226319220.1 | E |      |      |      |      | -1.9 | hypothetical protein                                   |                                                                   |
| <i>yddA</i>                         | NP_266488.1    | E |      | 2.4  | 2.6  |      | 3.0  | transporter transport and binding protein              |                                                                   |
| <i>ydgC</i>                         | NP_266512.1    | E |      |      |      |      | 1.8  | amino acid permease                                    |                                                                   |
| <i>yibG</i>                         | AAK04907.1     | E |      |      |      | -1.6 |      | amino acid permease transport and binding protein      |                                                                   |
| <i>ylcC</i>                         | NP_267269.1    | E | 2.0  |      |      |      |      | hypothetical protein                                   |                                                                   |
| <i>ylcF</i>                         | NP_267272.1    | E |      | 2.0  |      |      | 1.6  | hypothetical protein                                   |                                                                   |
| <i>yneH</i>                         | NP_267469.2    | E |      |      | 2.5  |      |      | hypothetical protein                                   |                                                                   |
| <i>yrfB</i>                         | NP_267851.1    | E |      |      |      |      | 1.8  | NADH-dependent oxidoreductase                          |                                                                   |
| <i>yrfD</i>                         | AAK05797.1     | E |      |      |      |      | 1.8  | amino acid antiporter                                  |                                                                   |
| <i>ysaB</i>                         | NP_267905.1    | E | 3.7  |      |      | 3.0  | 2.2  | ABC transporter permease and substrate binding protein |                                                                   |
| <i>ysaC</i>                         | NP_267906.1    | E | 3.0  |      |      | 2.8  | 2.1  | ABC transporter ATP-binding protein                    |                                                                   |
| <i>ysaD</i>                         | NP_267907.1    | E | 2.8  |      |      | 2.9  | 1.6  | hypothetical protein                                   |                                                                   |
| <i>yshA</i>                         | AAK05907.1     | E |      |      |      | -2.1 | -1.6 | glutamate antiporter                                   |                                                                   |
| <i>ysjA</i>                         | NP_267979.1    | E |      |      |      |      | -2.2 | -1.6                                                   | amino acid permease transport and binding protein                 |
| Nucleotide transport and metabolism |                |   |      |      |      |      |      |                                                        |                                                                   |
| <i>apt</i>                          | AE005176.1     | F | -2.5 |      |      |      |      |                                                        | adenine phosphoribosyltransferase                                 |
| <i>carA</i>                         | NC_022369.1    | F |      |      | -2.3 |      | -1.7 |                                                        | carbamoyl phosphate synthase small subunit                        |
| <i>carB</i>                         | AJ000109.1     | F |      |      | -1.9 |      | -2.3 |                                                        | carbamoyl phosphate synthase large subunit                        |
| <i>coaA</i>                         | AB863013.1     | F |      |      | 1.6  |      | -3.2 |                                                        | pantothenate kinase                                               |
| <i>dukA</i>                         | GEB08937.1     | F |      | -1.7 | -1.8 |      | -2.2 |                                                        | deoxynucleoside kinase nucleotide and nucleoside interconversions |
| <i>gmk</i>                          | NC_022369.1    | F | -2.0 |      |      |      |      |                                                        | guanylate kinase                                                  |
| <i>nrdE</i>                         | NZ_CP094882.1  | F | -2.1 |      |      |      | -1.5 |                                                        | ribonucleotide-diphosphate reductase subunit alpha                |
| <i>nrdG</i>                         | NC_020450.1    | F | -1.6 |      |      |      |      |                                                        | anaerobic ribonucleoside-triphosphate reductase                   |

|                                       |                |   |      |      |      |      |      |      |      |                                                         |               |
|---------------------------------------|----------------|---|------|------|------|------|------|------|------|---------------------------------------------------------|---------------|
| <i>pbuX</i>                           | NC_000964.3    | F | -1.8 |      |      |      |      |      |      | xanthine/uracil permease                                |               |
| <i>purR</i>                           | NP_268416.1    | F | 1.9  |      | 1.7  |      |      |      |      | <i>pur</i> operon repressor general regulatory function |               |
| <i>pydB</i>                           | NP_267502.1    | F |      | -2.5 | -1.5 | -2.4 |      |      |      | dihydroorotate transferase                              |               |
| <i>pyrB</i>                           | NP_267758.1    | F |      | -2.1 |      |      |      |      |      | aspartate carbamoyltransferase catalytic subunit        |               |
| <i>pyrC</i>                           | NP_267225.1    | F |      | -2.2 |      | -1.8 |      |      |      | dihydroorotase                                          |               |
| <i>pyrE</i>                           | NP_267224.1    | F |      | -2.7 | -2.0 | -2.2 |      | -1.9 |      | orotate phosphoribosyltransferase                       |               |
| <i>pyrF</i>                           | NP_267501.1    | F |      | -1.9 |      | -1.8 |      |      |      | orotidine 5'-phosphate decarboxylase type 1 subfamily   |               |
| <i>pyrP</i>                           | NP_267759.1    | F |      | -2.6 |      | -2.1 |      |      |      | uracil permease                                         |               |
| <i>pyrR</i>                           | SPS10181.1     | F |      |      |      | -2.4 |      |      |      | bifunctional pyrimidine regulatory protein PyrR         |               |
| <i>xpt</i>                            | AAK05244.1     | F | -2.8 |      |      |      |      |      |      | xanthine phosphoribosyltransferase                      |               |
| <i>yfiC</i>                           | NP_266745.1    | F |      | -1.6 |      |      |      |      |      | hypothetical protein                                    |               |
| <i>yfiG</i>                           | NP_266749.1    | F | -2.0 |      |      |      |      |      |      | thymidine kinase                                        |               |
| <i>ygcC</i>                           | NP_266791.1    | F | -1.7 |      |      |      |      |      |      | hypothetical protein                                    |               |
| <i>yriD</i>                           | NP_267887.1    | F | -1.7 |      |      |      |      |      |      | xanthine/uracil/vitamin C permease                      |               |
| Carbohydrate transport and metabolism |                |   |      |      |      |      |      |      |      |                                                         |               |
| <i>agl</i>                            | NP_267834.1    | G |      |      |      |      | 4.8  |      |      | alpha-glucosidase degradation of polysaccharides        |               |
| <i>amyL</i>                           | AE005176.1     | G |      |      | 1.7  |      |      |      |      | alpha-amylase                                           |               |
| <i>amyY</i>                           | AE005176.1     | G |      |      |      |      | 5.1  |      |      | alpha-amylase                                           |               |
| <i>dexA</i>                           | AE005176.1     | G |      |      |      |      | 4.7  |      |      | oligo—alpha-1,6-glucosidase                             |               |
| <i>dexC</i>                           | GFO79576.1     | G |      |      |      |      | 5.1  |      |      | neopullulanase                                          |               |
| <i>dhaL</i>                           | NC_022369.1    | G |      |      | 1.6  |      |      | 1.9  |      | dihydroxyacetone kinase                                 |               |
| <i>dhaM</i>                           | NC_022369.1    | G |      |      | 1.5  |      |      | 1.6  |      | dihydroxyacetone kinase                                 |               |
| <i>eno</i>                            | NC_022369.1    | G |      |      | 2.3  |      | 3.9  |      |      | phosphopyruvate hydratase enolase                       |               |
| <i>fruA</i>                           | AAK05057.1     | G | 2.0  |      | 1.8  |      |      |      |      | PTS system fructose-specific transporter subunit IIABC  |               |
| <i>fruC</i>                           | NC_015902.1    | G | 2.1  |      | 1.7  | 2.2  |      |      |      | 1-phosphofructokinase                                   |               |
| <i>galE</i>                           | WP_058218180.1 | G |      | -1.9 |      |      | -1.9 |      |      | UDP-glucose 4-epimerase                                 |               |
| <i>galK</i>                           | NC_002662.1    | G |      | -3.4 | -3.7 |      | -3.6 | -2.9 | -2.4 | -3.2                                                    | galactokinase |

|              |                |   |      |      |      |      |      |      |                                                              |
|--------------|----------------|---|------|------|------|------|------|------|--------------------------------------------------------------|
| <i>galM</i>  | NC_020450.1    | G | -3.4 | -3.5 | -3.7 | -2.9 | -2.3 | -2.9 | aldose 1-epimerase                                           |
| <i>galT</i>  | NC_022369.1    | G | -3.6 | -3.9 | -3.3 | -3.2 | -3.0 | -2.6 | galactose-1-phosphate uridylyltransferase                    |
| <i>galP</i>  | WP_004254704.1 | G | -3.7 | -4.0 | -3.0 | -3.0 | -2.4 | -2.5 | glycoside-pentoside-hexuronide (GHP): cation symporter       |
| <i>thgA</i>  | NP_268138.1    | G | -2.9 | -3.0 | -3.0 | -2.4 | -2.0 | -2.4 | thiogalactoside acetyltransferase                            |
| <i>lacZ</i>  | NC_002662.1    | G | -3.1 | -3.5 | -3.4 | -2.8 | -2.4 | -3.1 | beta-D-galactosidase                                         |
| <i>gapA</i>  | NC_020450.1    | G | 2.6  |      |      |      |      |      | glyceraldehyde 3-phosphate dehydrogenase                     |
| <i>glpF1</i> | NC_009004.1    | G | 1.7  |      | 1.7  |      |      |      | glycerol uptake facilitator                                  |
| <i>glpT</i>  | NC_009004.1    | G |      |      |      |      | 1.5  |      | glycerol-3-phosphatase transporter                           |
| <i>kdgA</i>  | NC_002662.1    | G | 2.1  | 1.8  |      |      | 2.4  |      | keto-hydroxyglutarate-aldolase                               |
| <i>malE</i>  | AAK05781.1     | G |      |      |      |      |      | -5.4 | maltose ABC transporter substrate binding protein            |
| <i>malF</i>  | AAK05782.1     | G |      |      |      |      |      | -5.3 | maltose ABC transporter permease                             |
| <i>malG</i>  | AAK05783.1     | G |      |      |      |      |      | -4.5 | maltose ABC transporter permease                             |
| <i>malQ</i>  | NC_002662.1    | G |      |      | 1.6  |      |      |      | 4-alpha-glucanotransferase                                   |
| <i>mtlF</i>  | NC_020450.1    | G |      |      |      |      | 1.6  |      | PTS system mannitol-specific transporter subunit IIA         |
| <i>nagA</i>  | NZ_CP094882.1  | G | -1.5 |      |      |      |      |      | N-acetylglucosamine-6-phosphate deacetylase                  |
| <i>ptbA</i>  | NP_267616.1    | G |      |      |      |      |      | -1.6 | PTS system beta-glucoside-specific transporter subunit IIABC |
| <i>rpiA</i>  | NP_268390.1    | G | 2.0  |      | 1.7  |      |      | 2.1  | ribose-5-phosphate isomerase A                               |
| <i>tagH</i>  | NP_267071.1    | G | 1.6  | 1.6  |      |      | 1.9  |      | teichoic acid ABC transporter ATP binding protein            |
| <i>xylA</i>  | NP_267665.1    | G |      |      | 2.0  |      |      |      | xylose isomerase                                             |
| <i>xylH</i>  | NP_266730.1    | G |      |      | -1.6 |      |      |      | 4-oxalocrotonate tautomerase                                 |
| <i>xylT</i>  | AAK05601.1     | G | 2.1  | 2.1  |      |      | 2.4  |      | D-xylose proton-symporter                                    |
| <i>xynB</i>  | NP_267664.1    | G |      |      |      |      | 1.6  |      | beta-1,4-xylosidase                                          |
| <i>xynT</i>  | AAK05604.1     | G |      | 1.6  |      |      | 2.1  |      | xyloside transporter                                         |
| <i>ycgC</i>  | NP_266420.1    | G | 1.5  |      |      |      |      |      | hypothetical protein                                         |
| <i>yeeB</i>  | AAK04528.1     | G | 2.1  |      |      |      |      |      | hydrolase                                                    |
| <i>yfbG</i>  | NP_266680.1    | G |      | -5.4 |      |      |      |      | hypothetical protein                                         |
| <i>yhgD</i>  | NP_266913.1    | G | 2.7  | 2.6  |      |      | 3.2  |      | hypothetical protein                                         |

|                                   |                |   |     |      |      |      |                                                                |                                                     |                                                    |
|-----------------------------------|----------------|---|-----|------|------|------|----------------------------------------------------------------|-----------------------------------------------------|----------------------------------------------------|
| <i>yhgE</i>                       | AAK04856.1     | G | 4.1 | 3.7  | 2.3  | 4.0  | hypothetical protein                                           |                                                     |                                                    |
| <i>yoiC</i>                       | NP_267614.1    | G |     |      |      | 1.6  | hypothetical protein                                           |                                                     |                                                    |
| <i>ypcA</i>                       | NP_267645.1    | G |     | 2.3  |      | 2.4  | P-beta-glucosidase                                             |                                                     |                                                    |
| <i>ypcC</i>                       | NP_267647.1    | G |     | -1.6 |      |      | hypothetical protein                                           |                                                     |                                                    |
| <i>ypcD</i>                       | NP_267648.1    | G |     | -1.6 |      |      | endo-beta-N-acetylglucosaminidase                              |                                                     |                                                    |
| <i>ypjA</i>                       | NP_267705.1    | G | 1.9 | 1.5  | 1.7  | 2.4  | dehydrogenase                                                  |                                                     |                                                    |
| <i>yqgE</i>                       | NP_267779.1    | G |     | 1.8  |      |      | transporter                                                    |                                                     |                                                    |
| <i>yqhA</i>                       | AAK05727.1     | G |     | -1.7 |      |      | hypothetical protein   aldose-1-epimerase                      |                                                     |                                                    |
| <i>yvdD</i>                       | NP_268205.1    | G |     | 1.5  |      |      | transporter                                                    |                                                     |                                                    |
| <i>yxdE</i>                       | NP_268407.1    | G | 1.6 |      |      |      | oxidoreductase                                                 |                                                     |                                                    |
| <i>yxdG</i>                       | NP_268409.1    | G | 2.6 | 2.7  | 2.7  | 1.9  | 2.0                                                            | 3.3                                                 | transporter                                        |
| <i>yxfA</i>                       | NP_268421.1    | G |     |      |      | -1.7 | transporter                                                    |                                                     |                                                    |
| Coenzyme transport and metabolism |                |   |     |      |      |      |                                                                |                                                     |                                                    |
| <i>apbE</i>                       | AE005176.1     | H |     |      |      | -2.3 | thiamine biosynthesis lipoprotein                              |                                                     |                                                    |
| <i>hemH</i>                       | NC_022369.1    | H |     |      | -1.7 |      | ferrochelatase protoheme ferro-lyase                           |                                                     |                                                    |
| <i>nadE</i>                       | NC_022369.1    | H | 3.2 |      | 1.9  |      | NAD synthetase                                                 |                                                     |                                                    |
| <i>pabA</i>                       | NC_000913.3    | H |     |      | -2.2 |      | -2.4                                                           | para-aminobenzoate synthase component II folic acid |                                                    |
| <i>pabB</i>                       | NC_000913.3    | H |     |      | -2.5 |      | -2.4                                                           | -1.7                                                | para-aminobenzoate synthase component I folic acid |
| <i>preA</i>                       | NC_013656.1    | H | 1.5 | 1.5  | 1.9  |      | prenyl transferase                                             |                                                     |                                                    |
| <i>ribG</i>                       | NP_267149.1    | H |     | 1.6  | 1.9  |      | riboflavin-specific deaminase riboflavin and cobalamin         |                                                     |                                                    |
| Lipid transport and metabolism    |                |   |     |      |      |      |                                                                |                                                     |                                                    |
| <i>accB</i>                       | WP_012897457.1 | I |     |      |      | 2.4  | acetyl-CoA carboxylase biotin carboxyl carrier protein subunit |                                                     |                                                    |
| <i>accC</i>                       | WP_012897458.1 | I |     |      |      | 1.7  | acetyl-CoA carboxylase biotin carboxylase subunit              |                                                     |                                                    |
| <i>accD</i>                       | SPS12911.1     | I |     |      |      | 1.6  | acetyl-CoA carboxylase subunit beta                            |                                                     |                                                    |
| <i>acpD</i>                       | CP009472.1     | I |     | -1.9 |      |      | ACP phosphodiesterase                                          |                                                     |                                                    |
| <i>butA</i>                       | NC_020450.1    | I |     | 1.5  |      |      | acetoin reductase fermentation                                 |                                                     |                                                    |
| <i>fabD</i>                       | NC_022369.1    | I |     |      |      | 2.3  | ACP S-malonyltransferase                                       |                                                     |                                                    |



|                                                        |                |   |      |      |      |      |                                                                        |
|--------------------------------------------------------|----------------|---|------|------|------|------|------------------------------------------------------------------------|
| <i>fabI</i>                                            | NC_022369.1    | I | 1.7  |      |      |      | enoyl-ACP reductase                                                    |
| <i>fabZ</i>                                            | NC_022369.1    | I | 1.6  |      |      | 2.2  | (3R)-hydroxymyristoyl-ACP dehydratase                                  |
| <i>fadD</i>                                            | AE005176.1     | I |      | -5.9 |      | 2.1  | long-chain acyl-CoA synthetase                                         |
| <i>yfbB</i>                                            | NP_461239.3    | I |      | -7.2 | -1.8 | -2.4 | hypothetical protein                                                   |
| <i>ygbB</i>                                            | NP_266781.1    | I | 1.7  | 2.2  | 1.7  | 1.5  | hypothetical protein                                                   |
| <i>yqaG</i>                                            | NP_267722.1    | I |      | -2.7 | -1.5 |      | hypothetical protein                                                   |
| <i>yveB</i>                                            | NP_268212.1    | I |      |      |      | 1.6  | hypothetical protein                                                   |
| <i>yveH</i>                                            | NP_268218.1    | I |      | 4.0  |      | 1.6  | hypothetical protein                                                   |
| <b>Translation, ribosomal structure and biogenesis</b> |                |   |      |      |      |      |                                                                        |
| <i>aldR</i>                                            | JXKB01000001.1 | J | 1.5  |      |      |      | AldR regulatory protein                                                |
| <i>rluC</i>                                            | NP_267508.1    | J |      |      |      | 1.7  | pseudouridine synthase                                                 |
| <i>truB</i>                                            | NP_267282.1    | J |      |      |      | -1.6 | tRNA pseudouridine synthase B                                          |
| <i>yabC</i>                                            | NP_266164.1    | J | 1.8  |      |      |      | hypothetical protein                                                   |
| <i>ybiD</i>                                            | NP_266335.1    | J |      |      | 1.5  |      | ribosomal RNA large subunit methyltransferase                          |
| <i>ygdA</i>                                            | NP_266799.1    | J |      | 1.6  | 1.9  | 1.7  | hypothetical protein                                                   |
| <i>ynjI</i>                                            | AAK05309.1     | J | 1.9  |      | 1.7  | 1.6  | hypothetical protein                                                   |
| <i>ynjJ</i>                                            | NP_267518.1    | J | 2.3  |      | 1.6  |      | hypothetical protein                                                   |
| <i>ywfF</i>                                            | NP_268336.1    | J | -1.7 |      |      |      | hypothetical protein                                                   |
| <i>ywfG</i>                                            | NP_268337.1    | J | 2.4  |      | 2.5  |      | hypothetical protein                                                   |
| <b>Transcription</b>                                   |                |   |      |      |      |      |                                                                        |
| <i>adaA</i>                                            | WP_129881369.1 | K |      |      |      | 1.9  | methylphosphotriester-DNA alkyltransferase                             |
| <i>cspD</i>                                            | AE005176.1     | K |      | -6.1 |      |      | cold shock protein D                                                   |
| <i>cspE</i>                                            | Y17217.1       | K |      | 1.6  |      |      | cold shock protein E                                                   |
| <i>dhaK</i>                                            | NP_266402.2    | K |      |      | 2.0  | 2.3  | <i>dhaKLM</i> operon coactivator, dihydroxyacetone utilization pathway |
| <i>fur</i>                                             | NC_002662.1    | K | 2.2  |      |      |      | ferric uptake regulator                                                |
| <i>gadR</i>                                            | NZ_CP017194.1  | K |      | -2.2 |      | -1.9 | positive regulator                                                     |
| <i>hrcA</i>                                            | NC_022369.1    | K | 1.6  |      |      |      | heat-inducible transcription repressor                                 |

|              |             |   |      |      |     |     |     |      |                                                                                                 |
|--------------|-------------|---|------|------|-----|-----|-----|------|-------------------------------------------------------------------------------------------------|
| <i>fruR</i>  | NC_017478.1 | K |      |      |     |     |     | 1.6  | DeoR family transcription regulator of fructose utilization pathway                             |
| <i>nadR</i>  | NC_020450.1 | K | 2.1  |      |     |     |     | 1.7  | NadR family transcription regulator, NAD cellular biosynthesis pathway                          |
| <i>phoU</i>  | NC_022369.1 | K | 2.1  |      |     |     |     |      | phosphate transport system regulator                                                            |
| <i>rcfB</i>  | NP_268391.1 | K |      |      |     |     |     | 1.8  | CRP/FNR family transcription regulator involved in pH homeostasis                               |
| <i>rliA</i>  | NP_267832.1 | K | 2.8  | 1.6  |     |     |     | 1.9  | transcriptional regulator LacI-family regulators, putative regulatory function                  |
| <i>rliDB</i> | NP_268306.1 | K |      | 3.0  | 2.3 | 3.2 | 2.1 | 3.3  | transcriptional regulator LacI-family regulators, putative regulatory function                  |
| <i>rlrA</i>  | NP_267392.1 | K |      |      |     |     |     | -1.6 | LysR-family transcription regulator, putative regulatory function                               |
| <i>rmaA</i>  | NP_266898.1 | K |      | -1.6 |     |     |     | -1.6 | MarR family transcriptional regulator of fatty acid biosynthesis pathway                        |
| <i>rmaG</i>  | NP_266926.1 | K |      | -2.1 |     |     |     |      | MarR family transcriptional regulator of fatty acid biosynthesis pathway                        |
| <i>rmaJ</i>  | NP_266747.1 | K | -1.6 |      |     |     |     |      | MarR-family transcriptional regulator of hyaluronan biosynthesis pathway                        |
| <i>rpoD</i>  | NP_266709.1 | K | 1.8  |      |     |     |     |      | RNA polymerase sigma factor RpoD                                                                |
| <i>sigX</i>  | NP_268323.1 | K |      |      |     |     |     | 1.6  | RNA polymerase ECF sigma factor                                                                 |
| <i>tagR</i>  | NP_267067.1 | K |      |      |     |     |     | 1.9  | transcriptional regulator similar to EpsR, possibly involved in exopolysaccharides biosynthesis |
| <i>ybaI</i>  | NP_266263.1 | K | -1.8 |      |     |     |     |      | glycosyl transferase glycosyltransferase family 2                                               |
| <i>ybeF</i>  | NP_266307.1 | K |      | 1.7  | 2.0 | 1.9 |     | 2.3  | hypothetical protein                                                                            |
| <i>yfeA</i>  | NP_266710.1 | K |      | 1.6  |     | 2.1 |     |      | RpiR family of transcription regulator, putative regulatory function                            |
| <i>ygfC</i>  | NP_266817.1 | K |      | -2.9 |     |     |     | -4.8 | TetR/AcrR family transcription regulator of heme homeostasis processes                          |
| <i>yjaB</i>  | NP_267035.1 | K | 2.5  |      |     |     |     |      | transcriptional regulator, LytR family, putative regulatory function                            |

|                                       |             |   |      |      |      |                                                                             |                                                                        |
|---------------------------------------|-------------|---|------|------|------|-----------------------------------------------------------------------------|------------------------------------------------------------------------|
| <i>yjaJ</i>                           | AAK04985.1  | K | 1.6  |      |      | transcriptional regulator, LytR family, putative regulatory function        |                                                                        |
| <i>ykhD</i>                           | NP_267216.1 | K |      | 1.8  |      | redox-sensing transcriptional repressor Rex                                 |                                                                        |
| <i>yliA</i>                           | NP_267323.1 | K | 2.0  |      |      | positive transcription regulator                                            |                                                                        |
| <i>ynaA</i>                           | NP_267426.1 | K | 2.2  |      |      | transcriptional regulator, heat and DNA damage induction                    |                                                                        |
| <i>ynaB</i>                           | AAK05369.1  | K | 2.2  |      | 1.5  | transcriptional regulator, putative regulatory function                     |                                                                        |
| <i>ynaE</i>                           | NP_267430.2 | K |      | 1.6  |      | hypothetical protein, putative regulatory function                          |                                                                        |
| <i>yogM</i>                           | NP_267604.1 | K | 1.6  | 1.6  |      | hypothetical protein                                                        |                                                                        |
| <i>yohC</i>                           | AAK05547.1  | K |      |      | 1.6  | TetR/AcrR family transcription regulator, putative regulatory function      |                                                                        |
| <i>yqfA</i>                           | NP_266815.1 | K |      | -1.7 |      | hypothetical protein                                                        |                                                                        |
| <i>yrfA</i>                           | NP_267850.1 | K | 1.5  |      |      | ArsR family transcription regulator, putative regulatory function           |                                                                        |
| <i>yrfE</i>                           | NP_267858.1 | K |      | -1.6 |      | LytR family transcriptional regulator , putative regulatory function        |                                                                        |
| <i>glaR</i>                           | NP_268142.1 | K |      | -1.8 | -1.7 | RpiR family transcription regulator of galactose utilization Leloir pathway |                                                                        |
| <i>ywjD</i>                           | NP_268370.1 | K |      | -1.7 | -1.7 | -1.8                                                                        | PBSX(XRE) family transcription regulator, putative regulatory function |
| <i>yxbF</i>                           | NP_268394.1 | K |      | -2.2 | 2.4  |                                                                             | hypothetical protein                                                   |
| Replication, recombination and repair |             |   |      |      |      |                                                                             |                                                                        |
| <i>comEA</i>                          | NC_002662.1 | L | 1.6  |      |      |                                                                             | hypothetical protein competence protein                                |
| <i>dinG</i>                           | NC_022369.1 | L |      |      | -1.5 |                                                                             | DinG ATP-dependent helicase                                            |
| <i>dinP</i>                           | NC_000962.3 | L |      |      |      | 1.7                                                                         | DNA polymerase IV                                                      |
| <i>hslB</i>                           | NC_002662.1 | L | 2.5  |      |      | 2.3                                                                         | HU-like DNA-binding protein                                            |
| <i>recJ</i>                           | SPS10369.1  | L | -1.6 |      |      |                                                                             | ssDNA-specific exonuclease RecJ                                        |
| <i>recX</i>                           | NP_268339.1 | L | 1.7  |      |      |                                                                             | recombination regulator RecX                                           |
| <i>ssbA</i>                           | NP_266548.1 | L |      |      | 3.1  | 1.6                                                                         | single-stranded DNA-binding protein                                    |
| <i>xerD</i>                           | NP_266801.1 | L | 1.5  |      |      |                                                                             | integrase-recombinase                                                  |



| Posttranslational modification, protein turnover, chaperones |             |   |     |     |     |      |     |               |                                                                                  |
|--------------------------------------------------------------|-------------|---|-----|-----|-----|------|-----|---------------|----------------------------------------------------------------------------------|
| <i>clpE</i>                                                  | AF023421.1  | O | 2.4 |     |     |      |     |               | ATP-dependent protease                                                           |
| <i>gpo</i>                                                   | NC_020450.1 | O | 1.8 |     |     |      |     |               | glutathione peroxidase thioredoxin, glutaredoxin, and glutathione                |
| <i>groES</i>                                                 | NC_022369.1 | O | 2.8 |     |     |      |     |               | co-chaperonin GroES 10 kDa chaperonin                                            |
| <i>osmC</i>                                                  | PLW60135.1  | O | 2.5 |     |     |      |     |               | osmotically inducible protein                                                    |
| <i>pmsX</i>                                                  | NC_020450.1 | O | 2.0 |     |     |      |     |               | peptide methionine sulfoxide reductase t                                         |
| <i>sugE</i>                                                  | NP_266278.1 | O |     | 1.8 | 2.3 | 2.2  |     |               | SugE protein chaperones                                                          |
| <i>ybjA</i>                                                  | NP_266345.1 | O | 1.9 |     |     |      |     |               | methionine sulfoxide reductase B                                                 |
| <i>yfcF</i>                                                  | NP_266694.1 | O |     | 2.0 | 1.5 | 2.0  |     | 1.9           | hypothetical protein                                                             |
| <i>ynhC</i>                                                  | NP_267492.1 | O | 1.5 |     |     |      |     |               | hypothetical protein                                                             |
| <i>ynhD</i>                                                  | NP_267493.1 | O |     |     | 1.7 |      |     |               | hypothetical protein                                                             |
| Inorganic ion transport and metabolism                       |             |   |     |     |     |      |     |               |                                                                                  |
| <i>amtB</i>                                                  | AAK05690.1  | P |     |     |     | -1.7 |     | 1.9           | -1.7 -2.2 ammonium transporter                                                   |
| <i>busAB</i>                                                 | AF393650.1  | P |     |     |     |      | 1.8 |               | betaine ABC transporter permease and substrate binding protein                   |
| <i>cadA</i>                                                  | U78967.1    | P | 2.3 |     |     | 3.7  |     | 2.4           | cadmium efflux ATPase transort and binding protein                               |
| <i>cbiO</i>                                                  | AE005176.1  | P |     |     |     | 2.3  |     | 3.9           | cobalt transporter ATP-binding subunit                                           |
| <i>feoA</i>                                                  | NC_022369.1 | P |     |     |     |      |     | 1.5           | ferrous ion transport protein A                                                  |
| <i>mtsA</i>                                                  | AAK05414.1  | P |     |     |     | -3.2 |     | -3.7 -3.6     | manganese ABC importer                                                           |
| <i>mtsB</i>                                                  | AAK05416.1  | P |     |     |     | -2.0 |     | -2.7          | manganese ABC importer                                                           |
| <i>mtsC</i>                                                  | AAK05415.1  | P |     |     |     | -2.0 |     | -2.6 -3.8     | manganese ABC importer permease                                                  |
| <i>pacL</i>                                                  | AAK04776.1  | P |     |     |     | 2.3  |     | 2.4           | magnesium-transporting ATPase                                                    |
| <i>pstF</i>                                                  | NC_022369.1 | P | 1.5 |     |     |      |     |               | phosphate ABC transporter substrate-binding protein                              |
| <i>yafB</i>                                                  | AAK04148.1  | P |     | 2.1 | 1.6 | 2.7  |     | 2.6           | sulfate permease, MFS superfamily                                                |
| <i>ybcC</i>                                                  | NP_266275.1 | P |     | 1.8 |     | 1.7  |     | 1.7           | MATE family efflux transporter                                                   |
| <i>yceA</i>                                                  | NP_266398.1 | P |     | 1.6 |     |      |     | 1.6           | hypothetical protein                                                             |
| <i>ydiF</i>                                                  | NP_266539.1 | P |     |     |     |      | 1.7 |               | Na <sup>+</sup> /H <sup>+</sup> antiporter transort and binding protein, cations |
| <i>ygfE</i>                                                  | AAK04761.1  | P |     |     | 1.8 | -5.7 |     | -1.9 -2.7 2.0 | magnesium importer and exporter                                                  |

|                                                              |                |   |      |     |      |                                                                 |                                                  |
|--------------------------------------------------------------|----------------|---|------|-----|------|-----------------------------------------------------------------|--------------------------------------------------|
| <i>yjdJ</i>                                                  | NP_266539.1    | P | 1.7  | 2.1 | 1.8  | potassium channel protein transort and binding protein, cations |                                                  |
| <i>ymgF</i>                                                  | NP_267394.1    | P | 1.9  | 1.6 |      | hypothetical protein                                            |                                                  |
| <i>ynjC</i>                                                  | NP_267510.1    | P |      |     | 1.6  | hypothetical protein                                            |                                                  |
| <i>ynjE</i>                                                  | NP_267512.1    | P | 1.9  | 1.5 | 1.6  | hypothetical protein                                            |                                                  |
| <i>ynjF</i>                                                  | NP_267513.1    | P |      |     | 1.6  | hypothetical protein                                            |                                                  |
| <i>yphB</i>                                                  | NP_267639.1    | P | 1.8  | 2.0 | 2.1  | magnesium transporter transport and binding protein             |                                                  |
| <i>ytgB</i>                                                  | NP_268049.1    | P | 2.3  | 2.0 |      | cesium ABC transporter substrate binding protein                |                                                  |
| <i>yuhE</i>                                                  | AAK06092.1     | P | 2.5  | 1.5 | 1.8  | copper homeostasis protein                                      |                                                  |
| <i>yvfA</i>                                                  | NP_268222.1    | P | 1.5  |     |      | metal ABC transporter substrate binding protein                 |                                                  |
| Secondary metabolites biosynthesis, transport and catabolism |                |   |      |     |      |                                                                 |                                                  |
| <i>aldC</i>                                                  | NC_000962.3    | Q |      | 2.0 |      | alpha-acetolactate decarboxylase fermentation                   |                                                  |
| <i>dltA</i>                                                  | WP_058205708.1 | Q | 3.0  | 2.1 |      | D-alanine-poly(phosphoribitol) ligase subunit 1                 |                                                  |
| <i>dltC</i>                                                  | QQE99144.1     | Q | -1.9 | 2.2 | -1.8 | -2.2                                                            | D-alanine-poly(phosphoribitol) ligase subunit 2  |
| <i>fabG2</i>                                                 | AE005176.1     | Q | 2.1  | 1.9 | 2.1  | 1.6                                                             | 3-oxoacyl-ACP reductase                          |
| <i>yoaI</i>                                                  | NP_267527.1    | Q |      | 1.6 |      |                                                                 | hypothetical protein                             |
| <i>yrbC</i>                                                  | NP_267819.1    | Q |      |     | 1.8  |                                                                 | 1,4-dihydroxy-2-naphthoate octaprenyltransferase |
| <i>yrbE</i>                                                  | NP_267821.1    | Q |      | 1.6 | 2.0  |                                                                 | hypothetical protein                             |
| General function prediction                                  |                |   |      |     |      |                                                                 |                                                  |
| <i>comEC</i>                                                 | AAK05870.1     | R | 1.9  | 1.9 | 2.4  |                                                                 | hypothetical protein competence protein          |
| <i>yhhD</i>                                                  | AAK04860.1     | R | 2.0  | 1.7 | 1.5  | 2.6                                                             | hypothetical protein                             |
| <i>ysbA</i>                                                  | AAK05851.1     | R | 1.6  |     |      | 1.6                                                             | hypothetical protein                             |
| <i>ysbD</i>                                                  | NP_267914.1    | R | -2.2 |     | -1.8 |                                                                 | hypothetical protein                             |
| <i>ythC</i>                                                  | AAK06004.1     | R |      | 2.4 |      |                                                                 | hypothetical protein                             |
| Function unknown                                             |                |   |      |     |      |                                                                 |                                                  |
| <i>L20006</i><br><i>5</i>                                    | YP_005869326.1 | S |      |     | 2.3  | 1.7                                                             | hypothetical protein                             |
| <i>yafJ</i>                                                  | NP_266211.1    | S | 1.6  |     | 2.0  |                                                                 | hypothetical protein                             |
| <i>yaiB</i>                                                  | NP_266234.1    | S | 1.7  | 1.7 | 2.0  |                                                                 | hypothetical protein                             |

|             |             |   |      |      |      |      |                      |
|-------------|-------------|---|------|------|------|------|----------------------|
| <i>yaiH</i> | NP_266241.1 | S |      | 1.7  | 1.6  | 1.7  | hypothetical protein |
| <i>yaiI</i> | NP_266239.1 | S | 2.4  | 2.0  |      | 2.4  | hypothetical protein |
| <i>yaiJ</i> | BAL52160.1  | S | 2.6  | 2.2  | 1.8  | 3.2  | hypothetical protein |
| <i>ybeH</i> | NP_266301.1 | S |      |      | 2.3  | 1.9  | hypothetical protein |
| <i>ybfC</i> | NP_266313.1 | S |      | 2.0  |      |      | hypothetical protein |
| <i>ybgA</i> | NP_266314.1 | S | 1.6  | 1.8  |      |      | hypothetical protein |
| <i>ycdA</i> | NP_266387.1 | S |      | 1.6  |      |      | hypothetical protein |
| <i>yciF</i> | NP_266444.1 | S | 1.5  |      |      |      | hypothetical protein |
| <i>yciG</i> | NP_266445.1 | S | 1.8  |      | 2.1  | 2.3  | hypothetical protein |
| <i>ydbD</i> | AAK04412.1  | S |      |      |      | 1.5  | hypothetical protein |
| <i>yeiD</i> | NP_266641.1 | S | 2.2  |      | -2.3 |      | hypothetical protein |
| <i>yfbK</i> | NP_266684.1 | S |      | -3.5 | -2.1 |      | hypothetical protein |
| <i>yfiH</i> | AAK04692.1  | S | -1.8 |      |      |      | hypothetical protein |
| <i>yfiI</i> | AAK04694.1  | S | -2.0 |      |      |      | hypothetical protein |
| <i>ygaD</i> | AAK04713.1  | S | -1.8 |      |      |      | hypothetical protein |
| <i>ygeB</i> | NP_266810.1 | S |      |      | -1.6 | -2.1 | hypothetical protein |
| <i>ygeC</i> | NP_266811.1 | S | -2.1 |      |      |      | hypothetical protein |
| <i>yghB</i> | NP_266830.1 | S |      |      |      | 1.5  | hypothetical protein |
| <i>yhhA</i> | NP_266915.1 | S | 1.8  |      |      | 2.3  | hypothetical protein |
| <i>yhhB</i> | NP_266916.1 | S |      |      |      | 1.7  | hypothetical protein |
| <i>yhhC</i> | NP_266917.1 | S |      |      | 2.6  |      | hypothetical protein |
| <i>yhjA</i> | AAK04881.1  | S | 4.3  | 2.1  | 1.9  | 2.5  | hypothetical protein |
| <i>yhjE</i> | NP_266943.1 | S |      |      |      | -1.7 | hypothetical protein |
| <i>yiaC</i> | NP_266951.1 | S | -1.8 |      |      |      | hypothetical protein |
| <i>yiiD</i> | NP_267017.1 | S |      |      | 2.1  |      | hypothetical protein |
| <i>yjdl</i> | NP_267069.1 | S | 2.0  |      |      | 1.8  | hypothetical protein |
| <i>yjff</i> | NP_267090.1 | S | 1.6  |      |      |      | hypothetical protein |
| <i>ykbC</i> | AAK05084.1  | S | 1.8  |      |      | 2.2  | hypothetical protein |
| <i>ykbD</i> | NP_267143.1 | S | 1.9  | 1.5  |      | 1.9  | hypothetical protein |

|             |                |   |     |      |     |      |      |      |      |                                         |
|-------------|----------------|---|-----|------|-----|------|------|------|------|-----------------------------------------|
| <i>ykbE</i> | NP_267144.1    | S |     |      | 1.6 |      |      |      |      | hypothetical protein                    |
| <i>ykcE</i> | NP_267155.1    | S | 2.0 |      |     |      |      |      |      | hypothetical protein                    |
| <i>ykJI</i> | NP_267241.1    | S |     | -2.0 |     |      |      | -2.3 |      | hypothetical protein                    |
| <i>ylhB</i> | NP_267317.1    | S |     |      | 2.5 |      |      |      |      | hypothetical protein                    |
| <i>yliD</i> | AAK05268.1     | S |     | 2.5  | 1.9 |      |      | 2.6  |      | hypothetical protein                    |
| <i>ymbC</i> | NP_267348.1    | S |     |      | 1.7 | 2.0  | 1.9  | 1.9  |      | hypothetical protein                    |
| <i>ymbD</i> | NP_267349.1    | S |     | 2.3  | 2.0 | 2.1  |      | 2.6  |      | hypothetical protein                    |
| <i>ymbH</i> | NP_835314.1    | S |     | 1.7  |     |      |      | 1.8  |      | hypothetical protein, putative protease |
| <i>ymcA</i> | NP_267355.1    | S |     | 1.6  |     |      |      | 2.1  |      | hypothetical protein                    |
| <i>ymcB</i> | NP_267356.1    | S |     | 2.0  |     |      |      | 2.0  |      | hypothetical protein                    |
| <i>ymcC</i> | NP_267357.1    | S |     | 2.2  |     |      |      | 1.6  |      | hypothetical protein                    |
| <i>ymeA</i> | AAK05317.1     | S |     | 2.6  | 2.5 |      | 1.8  | 3.2  |      | hypothetical protein                    |
| <i>ymhG</i> | YP_007508531.1 | S |     |      |     |      |      | 1.8  |      | hypothetical protein                    |
| <i>yndE</i> | NP_267456.1    | S |     | 1.7  |     |      |      |      |      | hypothetical protein                    |
| <i>yneC</i> | NP_267464.1    | S | 4.0 |      | 2.4 | 3.1  |      |      |      | hypothetical protein                    |
| <i>yneG</i> | NP_267468.1    | S |     |      | 2.6 |      |      |      |      | hypothetical protein                    |
| <i>ynfH</i> | NP_267481.1    | S |     | 2.4  |     | 2.7  | 2.9  | 1.9  | 2.1  | hypothetical protein                    |
| <i>ynhA</i> | NP_267490.1    | S |     |      |     |      |      |      | -2.8 | hypothetical protein                    |
| <i>yniC</i> | NP_267500.1    | S |     |      |     |      | -1.6 |      |      | hypothetical protein                    |
| <i>yniJ</i> | NP_267507.1    | S |     | 1.7  |     | 1.7  |      | 2.1  |      | hypothetical protein                    |
| <i>yofM</i> | NP_267590.1    | S |     | -2.0 |     |      |      | -1.8 |      | DNA-binding protein                     |
| <i>yohD</i> | NP_267606.1    | S | 1.7 |      |     |      |      |      |      | hypothetical protein                    |
| <i>ypaG</i> | NP_267633.1    | S |     |      | 1.6 |      |      |      |      | hypothetical protein                    |
| <i>ypiH</i> | AAK05645.1     | S |     |      |     |      |      | 1.7  |      | hypothetical protein                    |
| <i>ypiJ</i> | NP_267702.1    | S |     |      |     |      |      | 1.8  |      | hypothetical protein                    |
| <i>ypiL</i> | NP_267704.1    | S |     |      | 1.5 |      |      |      |      | hypothetical protein                    |
| <i>yqbl</i> | YP_007508825.1 | S |     |      | 1.6 |      |      | 2.0  |      | hypothetical protein                    |
| <i>yraE</i> | NP_267813.1    | S |     |      |     |      | 1.6  |      |      | hypothetical protein                    |
| <i>yrbB</i> | AAK05760.1     | S |     |      |     | -1.7 |      |      |      | hypothetical protein                    |



|                                                                      |             |   |      |     |           |                                                                       |
|----------------------------------------------------------------------|-------------|---|------|-----|-----------|-----------------------------------------------------------------------|
| <i>yrbH</i>                                                          | AAK05766.1  | S | 1.8  | 1.6 | 2.6       | hypothetical protein                                                  |
| <i>yreB</i>                                                          | NP_267843.1 | S | -1.6 |     |           | hypothetical protein                                                  |
| <i>yreD</i>                                                          | AAK05787.1  | S | 3.7  |     | 3.9 3.8   | hypothetical protein                                                  |
| <i>yseD</i>                                                          | AAK05883.1  | S | 2.0  | 2.0 | 2.3       | hypothetical protein                                                  |
| <i>ysjF</i>                                                          | AAK05925.1  | S | 1.8  | 2.0 | 2.6       | hypothetical protein                                                  |
| <i>ytbD</i>                                                          | NP_268007.1 | S | 3.3  |     |           | hypothetical protein                                                  |
| <i>ytcD</i>                                                          | NP_268015.1 | S | 2.3  |     |           | hypothetical protein                                                  |
| <i>yuaE</i>                                                          | NP_268084.2 | S |      |     | -2.1 -1.9 | hypothetical protein                                                  |
| <i>yueC</i>                                                          | NP_268082.1 | S | 1.8  | 2.0 | 1.8 2.0   | hypothetical protein                                                  |
| <i>yuhC</i>                                                          | NP_268149.1 | S | 1.5  |     |           | hypothetical protein                                                  |
| <i>yujF</i>                                                          | NP_268177.1 | S | 2.4  | 1.9 | 2.3       | hypothetical protein                                                  |
| <i>yviI</i>                                                          | NP_268276.1 | S | 2.0  | 1.8 | 2.9       | hypothetical protein                                                  |
| <i>yxcD</i>                                                          | NP_268398.1 | S |      | 1.9 | 1.5       | hypothetical protein                                                  |
| <b>Signal transduction mechanisms</b>                                |             |   |      |     |           |                                                                       |
| <i>floL</i>                                                          | NC_002662.1 | T | 1.6  |     |           | flotillin-like protein                                                |
| <i>kinA</i>                                                          | NC_002662.1 | T |      |     | -1.7      | sensor protein kinase                                                 |
| <i>kinB</i>                                                          | NC_002662.1 | T | 1.7  |     |           | sensor protein kinase                                                 |
| <i>llrA</i>                                                          | NC_019435.1 | T | 1.7  |     |           | two-component system regulator                                        |
| <i>ybdC</i>                                                          | NP_266285.1 | T | -2.1 |     | -1.5      | hypothetical protein                                                  |
| <i>yfgF</i>                                                          | NP_266724.1 | T |      |     | 2.0       | ABC transporter permease                                              |
| <i>yjjE</i>                                                          | NP_267123.1 | T | 2.6  |     |           | hypothetical protein                                                  |
| <i>ythA</i>                                                          | AAK06002.1  | T | 1.9  | 3.3 |           | hypothetical protein                                                  |
| <i>ythB</i>                                                          | AAK06003.1  | T |      | 2.8 |           | hypothetical protein                                                  |
| <i>yudH</i>                                                          | NP_268117.1 | T | -1.7 |     |           | hypothetical protein dihydrofolate reductase                          |
| <b>Intracellular trafficking, secretion, and vesicular transport</b> |             |   |      |     |           |                                                                       |
| <i>comC</i>                                                          | NC_002662.1 | U |      |     | 2.0       | type 4 prepilin-like protein specific leader peptidase transformation |
| <i>comGA</i>                                                         | AAK06221.1  | U | 2.6  | 2.6 | 2.8       | protein ComGA competence protein                                      |
| <i>comGB</i>                                                         | NC_000964.3 | U | 2.5  | 1.8 | 2.6       | protein ComGB competence protein                                      |

|                           |               |   |      |      |             |                                                          |
|---------------------------|---------------|---|------|------|-------------|----------------------------------------------------------|
| <i>comGC</i>              | NC_022369.1   | U | 2.2  | 2.6  | 2.6         | protein ComGC competence protein                         |
| <i>comGD</i>              | NZ_CP059048.1 | U | 2.7  | 1.7  | 1.5 1.9 1.6 | protein ComGD competence protein                         |
| <i>ftsY</i>               | NC_022369.1   | U | 1.7  | 1.7  |             | hypothetical protein                                     |
| <b>Defence mechanisms</b> |               |   |      |      |             |                                                          |
| <i>lmrP</i>               | QQF00039.1    | V | -1.9 | 2.5  | 1.5 1.8     | multidrug efflux MFS transporter                         |
| <i>ybdI</i>               | NP_266290.1   | V |      |      | 1.6 1.7     | hypothetical protein                                     |
| <i>ybfD</i>               | NP_266310.1   | V | 1.6  | 2.4  | 1.9         | transporter transport and binding protein                |
| <i>yffF</i>               | NP_266765.1   | V |      | 2.7  | 1.9         | membrane transport protein transport and binding protein |
| <i>ygfA</i>               | NP_266815.1   | V |      | -2.8 |             | ABC transporter ATP-binding protein                      |
| <i>ygfB</i>               | NP_266816.1   | V |      | -4.8 |             | ABC transporter permease                                 |
| <i>yhcA</i>               | NP_266870.1   | V |      | 1.5  |             | ABC transporter ATP-binding protein/permease             |
| <i>yhcC</i>               | NP_266871.1   | V |      | 2.0  |             | hypothetical protein                                     |
| <i>yhcE</i>               | NP_266874.1   | V | -2.1 |      | -1.7        | hypothetical protein                                     |
| <i>ykJJ</i>               | NP_267248.1   | V |      | 1.5  | 1.8         | hypothetical protein                                     |
| <i>ymdC</i>               | AAK05309.1    | V |      |      | 1.8         | kanamycin kinase                                         |
| <i>ypbC</i>               | AAK05582.1    | V | 2.2  | 1.9  | 2.8         | MATE family efflux transporter                           |
| <i>ypfE</i>               | NP_267672.1   | V | 1.8  | 1.9  | 2.0         | transporter transport and binding protein                |
| <i>ypgD</i>               | AAK05620.1    | V | -1.7 |      |             | multidrug resistance ABC transporter ATP-binding protein |
| <i>yvhA</i>               | AAK06200.1    | V | 1.7  | 1.6  |             | MATE family efflux transporter                           |
| <i>yweA</i>               | NP_268321.1   | V | 1.7  |      | 2.0         | membrane protein                                         |
| <i>yweE</i>               | NP_268328.1   | V | 2.1  | 1.5  |             | hypothetical protein                                     |
| <i>yweF</i>               | NP_268329.1   | V | 1.8  |      |             | hypothetical protein                                     |
| <i>ywiG</i>               | AAK06301.1    | V | 2.5  | 1.8  | 2.8         | ABC-type multidrug transport system, ATPase component    |
| <i>yxbD</i>               | NP_268392.1   | V |      | 3.9  | 3.1 -3.0    | multidrug transporter transport and binding protein      |
| <i>yxbE</i>               | NP_268393.1   | V | -2.2 | 2.2  | -2.1        | hypothetical protein                                     |
| <i>yxeA</i>               | NP_268412.1   | V | 1.6  | 1.9  |             | hypothetical protein                                     |

**Table S2.** Transcriptomic data set with relaxed Log2Ratio thresholds. A gene was identified as differentially expressed between the *L. lactis* strains if its transcript level differed by  $|\text{Log2Ratio}| \geq 1.5$  with statistical significance,  $p < 0.05$ . Bold and italic font shows chromosomal genes differentially expressed in the presence of plasmids with transcript levels 20% below the applied significance threshold ( $|\text{Log2Ratio}| \geq 1.2$ ) with statistical significance,  $p < 0.05$ .

[illegible]

|             |            |             |             |            |            |            |                                                               |
|-------------|------------|-------------|-------------|------------|------------|------------|---------------------------------------------------------------|
| <i>tyrS</i> | -1.7       |             | -2.5        |            |            |            | tyrosyl-tRNA synthetase                                       |
| <i>ybiE</i> | 1.9        |             |             |            | 3.3        |            | oxidoreductase                                                |
| <i>yddB</i> |            | <b>1.3</b>  |             |            | 2.0        |            | oxidoreductase                                                |
| <i>yfdE</i> | -1.8       |             |             |            |            |            | hypothetical protein similar to myo-inositol monophosphatases |
| <i>yfhC</i> | 2.6        |             | 1.5         | 3.7        |            |            | hypothetical protein                                          |
| <i>ygaJ</i> | 2.0        |             | <b>1.2</b>  |            |            |            | putative peptidase                                            |
| <i>yiaD</i> | 3.4        |             | 1.9         | <b>1.4</b> |            | 2.1        | NADH-flavin reductase                                         |
| <i>yjcA</i> |            | 1.7         | <b>-1.2</b> |            |            |            | ABC transporter ATP-binding protein                           |
| <i>yjgC</i> |            | <b>-1.4</b> |             |            |            | -1.5       | amino acid ABC transporter substrate binding protein          |
| <i>ylbA</i> | 1.6        |             |             |            |            |            | ABC transporter ATP-binding protein                           |
| <i>ymgG</i> | <b>1.4</b> | 1.7         |             | <b>1.5</b> | <b>1.4</b> |            | hypothetical protein                                          |
| <i>ymgH</i> |            | 1.6         |             |            | <b>1.4</b> | 1.5        | hypothetical protein                                          |
| <i>ymgK</i> | 1.5        |             |             |            |            | 2.4        | oxidoreductase                                                |
| <i>yobA</i> | 1.9        |             | <b>1.4</b>  | 1.7        |            |            | hypothetical protein                                          |
| <i>yogA</i> |            |             |             |            | -1.7       |            | hypothetical protein                                          |
| <i>yphC</i> |            |             |             |            | -3.9       |            | oxidoreductase                                                |
| <i>yqcA</i> |            | <b>1.2</b>  |             |            |            | 1.7        | oxidoreductase                                                |
| <i>yrjA</i> | -1.5       |             |             |            |            |            | hypothetical protein                                          |
| <i>yrjB</i> | <b>1.4</b> | 1.6         | 1.5         |            | 2.0        | 1.9        | oxidoreductase                                                |
| <i>yrjC</i> |            |             |             |            | 1.7        |            | iron-binding oxidase subunit                                  |
| <i>yugB</i> |            |             |             | <b>1.5</b> |            | 2.3        | oxidoreductase                                                |
| <i>ywdA</i> |            | <b>1.3</b>  |             |            |            | 1.8        | hypothetical protein                                          |
| <i>ywdC</i> |            | 1.7         |             |            |            | 1.7        | hypothetical protein                                          |
| <i>ywiD</i> | 2.9        |             |             |            |            |            | hypothetical protein                                          |
| <i>ywiH</i> |            | 2.8         | 2.2         |            | 1.6        | 3.3        | ABC transporter permease                                      |
| <i>ywjF</i> |            |             |             | 1.6        |            | <b>1.4</b> | 3-hydroxyisobutyrate dehydrogenase                            |
| <i>ezrA</i> | 2.4        |             |             | 1.8        |            |            | septation ring formation regulator EzrA                       |
| <i>scpA</i> |            |             |             |            |            | -1.6       | segregation and condensation protein A                        |
| <i>yihA</i> |            | 1.8         | 1.8         |            |            | 1.8        | hypothetical protein                                          |

|              |            |             |             |            |      |            |                                                                                                   |
|--------------|------------|-------------|-------------|------------|------|------------|---------------------------------------------------------------------------------------------------|
| <i>yihB</i>  |            | 1.7         | 1.6         |            | 1.5  |            | hypothetical protein                                                                              |
| <i>arcA</i>  | 1.8        |             |             | 3.0        | 2.8  | 2.5        | arginine deiminase                                                                                |
| <i>arcB</i>  | <b>1.4</b> | 1.7         |             | 2.8        | 2.2  | 2.3        | ornithine carbamoyltransferase                                                                    |
| <i>arcC1</i> |            |             |             | 2.7        |      |            | carbamate kinase                                                                                  |
| <i>arcC2</i> | 2.6        | 1.7         |             | 2.6        |      | <b>1.4</b> | carbamate kinase                                                                                  |
| <i>arcD1</i> |            | 1.8         |             | 3.2        | 1.9  | 2.1        | arginine/ornithine antiporter                                                                     |
| <i>argF</i>  | <b>1.3</b> | 1.7         |             | <b>1.3</b> |      | 1.7        | ornithine carbamoyltransferase                                                                    |
| <i>aroH</i>  |            |             | -2.0        |            |      |            | phospho-2-dehydro-3-deoxyheptonate aldolase                                                       |
| <i>asd</i>   |            |             |             |            |      | 2.3        | aspartate-semialdehyde dehydrogenase                                                              |
| <i>bmpA</i>  |            |             |             |            |      | -2.2       | basic membrane protein A                                                                          |
| <i>ceo</i>   |            |             |             | 1.7        |      |            | N5-carboxyethyl-ornithine synthase                                                                |
| <i>cysD</i>  |            |             |             |            |      | -2.2       | O-acetylhomoserine sulfhydrylase                                                                  |
| <i>cysK</i>  |            | -2.5        | <b>-1.4</b> | -2.6       | -1.6 | -2.7       | cysteine synthase serine family                                                                   |
| <i>cysM</i>  |            | -3.0        |             | -2.9       | -1.7 | -2.4       | cysteine synthase                                                                                 |
| <i>glnB</i>  |            |             |             |            | 2.1  |            | nitrogen regulatory protein P-II                                                                  |
| <i>glnQ</i>  |            |             | <b>-1.4</b> |            |      | -1.9       | glutamine ABC transporter ATP-binding protein                                                     |
| <i>hisA</i>  |            |             |             |            | 1.5  |            | 1-(5-phosphoribosyl)-5-[(5-phosphoribosylamino)methylideneamino]imidazole-4-carboxamide isomerase |
| <i>ilvD</i>  |            | <b>1.5</b>  | <b>1.3</b>  |            |      | 2.2        | dihydroxy-acid dehydratase                                                                        |
| <i>leuC</i>  |            |             |             |            | 1.5  | <b>1.4</b> | isopropylmalate isomerase large subunit dehydratase component                                     |
| <i>lysP</i>  |            | 2.0         | <b>1.2</b>  | <b>1.3</b> |      | 2.3        | lysine specific permease                                                                          |
| <i>mapA</i>  | 2.8        |             |             |            |      | 5.2        | maltose phosphorylase                                                                             |
| <i>metB1</i> | -1.5       | <b>-1.5</b> | <b>-1.3</b> |            |      |            | cystathionine gamma-synthase                                                                      |
| <i>metB2</i> |            | -2.8        | -1.6        | -2.4       | -1.6 | -3.2       | cystathionine gamma-synthase                                                                      |
| <i>oppA</i>  |            | 1.8         | <b>1.4</b>  |            |      | 2.4        | oligopeptide ABC transporter substrate binding protein                                            |
| <i>oppB</i>  |            | 3.2         | 7.6         | <b>1.5</b> |      | 3.8        | 6.4 oligopeptide ABC transporter permease                                                         |
| <i>oppC</i>  |            | <b>1.5</b>  | 7.9         | 2.0        |      | 2.0        | 6.3 oligopeptide ABC transporter permease                                                         |
| <i>oppD</i>  |            |             | 5.9         |            |      |            | 5.0 oligopeptide ABC transporter ATP binding protein                                              |
| <i>oppF</i>  |            | 1.5         | 6.9         |            |      | 1.8        | 5.7 oligopeptide ABC transporter ATP binding protein                                              |

|              |             |             |             |            |            |      |            |                                                                   |
|--------------|-------------|-------------|-------------|------------|------------|------|------------|-------------------------------------------------------------------|
| <i>optS</i>  |             | 1.8         | <b>1.3</b>  | 2.3        | <b>1.5</b> | 1.5  | 2.2        | oligopeptide ABC transporter substrate binding protein            |
| <i>pepDB</i> | 1.7         |             |             |            |            |      |            | dipeptidase                                                       |
| <i>pepF</i>  |             |             |             |            |            |      | 2.0 1.6    | oligoendopeptidase F                                              |
| <i>potA</i>  |             | <b>-1.3</b> | <b>-1.3</b> |            |            |      | -1.8       | spermidine/putrescine ABC transporter ATP-binding protein         |
| <i>poxL</i>  | 2.8         | 1.7         | 1.8         | 2.7        |            |      | 2.3        | pyruvate oxidase                                                  |
| <i>serB</i>  |             |             | 1.6         |            |            |      |            | phosphoserine phosphatase                                         |
| <i>ybeC</i>  | 1.9         |             | <b>1.3</b>  |            |            |      | 1.6        | hypothetical protein                                              |
| <i>yceJ</i>  |             |             |             | 1.6        |            |      | <b>1.5</b> | hypothetical protein                                              |
| <i>ycjI</i>  |             |             | <b>-1.3</b> |            |            |      | -1.9       | hypothetical protein                                              |
| <i>yddA</i>  |             | 2.4         | 2.6         |            |            |      | 3.0        | transporter transport and binding protein                         |
| <i>ydgC</i>  |             |             |             |            |            |      | 1.8        | amino acid permease                                               |
| <i>yibG</i>  |             |             |             | -1.6       |            |      |            | amino acid permease transport and binding protein                 |
| <i>ylcC</i>  | 2.0         |             |             |            |            |      |            | hypothetical protein                                              |
| <i>ylcF</i>  |             | 2.0         | <b>1.4</b>  |            |            |      | 1.6        | hypothetical protein                                              |
| <i>yneH</i>  |             |             | 2.5         |            |            |      |            | hypothetical protein                                              |
| <i>yrfB</i>  |             |             | <b>1.4</b>  |            |            |      | 1.8        | NADH-dependent oxidoreductase                                     |
| <i>yrfD</i>  |             |             |             |            |            |      | 1.8        | amino acid antiporter                                             |
| <i>ysaB</i>  | 3.7         |             |             | 3.0        |            |      | 2.2        | ABC transporter permease and substrate binding protein            |
| <i>ysaC</i>  | 3.0         |             |             | 2.8        |            |      | 2.1        | ABC transporter ATP-binding protein                               |
| <i>ysaD</i>  | 2.8         |             |             | 2.9        |            |      | 1.6        | hypothetical protein                                              |
| <i>yshA</i>  | <b>-1.4</b> |             |             | -2.1       |            | -1.6 |            | glutamate antiporter                                              |
| <i>ysjA</i>  |             |             |             |            |            |      | -2.2 -1.6  | amino acid permease transport and binding protein                 |
| <i>apt</i>   | -2.5        |             |             |            |            |      |            | adenine phosphoribosyltransferase                                 |
| <i>carA</i>  |             |             | -2.3        |            | -1.7       |      |            | carbamoyl phosphate synthase small subunit                        |
| <i>carB</i>  |             |             | -1.9        |            | -2.3       |      |            | carbamoyl phosphate synthase large subunit                        |
| <i>coaA</i>  |             |             | 1.6         | <b>1.4</b> | -3.2       |      |            | pantothenate kinase                                               |
| <i>dukA</i>  |             | -1.7        | -1.8        |            | -2.2       |      |            | deoxynucleoside kinase nucleotide and nucleoside interconversions |
| <i>gmK</i>   | -2.0        |             |             |            |            |      |            | guanylate kinase                                                  |
| <i>nrdE</i>  | -2.1        |             |             |            |            | -1.5 |            | ribonucleotide-diphosphate reductase subunit alpha                |

|             |      |             |             |             |             |             |      |                                                       |
|-------------|------|-------------|-------------|-------------|-------------|-------------|------|-------------------------------------------------------|
| <i>nrdG</i> | -1.6 |             |             |             | <b>-1.3</b> |             |      | anaerobic ribonucleoside-triphosphate reductase       |
| <i>pbuX</i> | -1.8 |             |             |             |             |             |      | xanthine/uracil permease                              |
| <i>purR</i> | 1.9  |             | 1.7         |             |             | <b>1.4</b>  |      | pur operon repressor general regulatory function      |
| <i>pydB</i> |      | -2.5        | -1.5        | -2.4        |             | <b>-1.3</b> |      | dihydroorotate transferase                            |
| <i>pyrB</i> |      | -2.1        |             |             |             |             |      | aspartate carbamoyltransferase catalytic subunit      |
| <i>pyrC</i> |      | -2.2        |             | -1.8        |             | <b>-1.3</b> |      | dihydroorotase                                        |
| <i>pyrE</i> |      | -2.7        | -2.0        | -2.2        |             | -1.9        |      | orotate phosphoribosyltransferase                     |
| <i>pyrF</i> |      | -1.9        |             | -1.8        |             |             |      | orotidine 5'-phosphate decarboxylase type 1 subfamily |
| <i>pyrP</i> |      | -2.6        |             | -2.1        |             | <b>-1.2</b> |      | uracil permease                                       |
| <i>pyrR</i> |      | <b>-1.2</b> |             | -2.4        |             |             |      | bifunctional pyrimidine regulatory protein PyrR       |
| <i>xpt</i>  | -2.8 |             |             |             |             |             |      | xanthine phosphoribosyltransferase                    |
| <i>yfiC</i> |      | -1.6        |             |             | <b>-1.4</b> |             |      | hypothetical protein                                  |
| <i>yfiG</i> | -2.0 |             |             | <b>-1.3</b> |             |             |      | thymidine kinase                                      |
| <i>ygcC</i> | -1.7 |             |             | <b>-1.3</b> |             |             |      | hypothetical protein                                  |
| <i>yriD</i> | -1.7 |             |             |             |             |             |      | xanthine/uracil/vitamin C permease                    |
| <i>agl</i>  |      |             |             |             |             | 4.8         |      | alpha-glucosidase degradation of polysaccharides      |
| <i>amyL</i> |      |             | 1.7         |             | <b>1.4</b>  |             |      | alpha-amylase                                         |
| <i>amyY</i> |      |             |             |             |             | 5.1         |      | alpha-amylase                                         |
| <i>dexA</i> |      |             |             |             |             | 4.7         |      | oligo-alpha-1,6-glucosidase                           |
| <i>dexC</i> |      |             |             |             |             | 5.1         |      | neopullulanase                                        |
| <i>dhaL</i> |      |             | 1.6         |             |             |             | 1.9  | dihydroxyacetone kinase subunit                       |
| <i>dhaM</i> |      |             | 1.5         |             |             |             | 1.6  | dihydroxyacetone kinase                               |
| <i>eno</i>  |      |             | 2.3         |             |             | 3.9         |      | phosphopyruvate hydratase enolase                     |
| <i>fruC</i> | 2.1  |             | 1.7         | 2.2         |             |             |      | 1-phosphofructokinase                                 |
| <i>fruA</i> | 2.0  |             | 1.8         |             |             |             |      | PTS system fructose-specific transporter subunit IIBC |
| <i>galE</i> |      | -1.9        | <b>-1.2</b> |             | -1.9        | <b>-1.2</b> |      | UDP-glucose 4-epimerase                               |
| <i>galK</i> |      | -3.4        | -3.7        | <b>1.3</b>  | -3.6        | -2.9        | -2.4 | galactokinase                                         |
| <i>galM</i> |      | -3.4        | -3.5        | <b>1.4</b>  | -3.7        | -2.9        | -2.3 | aldose 1-epimerase                                    |
| <i>galT</i> |      | -3.6        | -3.9        |             | -3.3        | -3.2        | -3.0 | galactose-1-phosphate uridylyltransferase             |

|              |             |            |     |            |            |      |      |                                                               |
|--------------|-------------|------------|-----|------------|------------|------|------|---------------------------------------------------------------|
| <i>gapA</i>  | 2.6         |            |     |            |            |      |      | glyceraldehyde 3-phosphate dehydrogenase                      |
| <i>glpF1</i> | 1.7         |            | 1.7 |            |            |      |      | glycerol uptake facilitator                                   |
| <i>glpT</i>  | <b>1.3</b>  | <b>1.4</b> |     |            | 1.5        |      |      | glycerol-3-phosphatase transporter                            |
| <i>kdgA</i>  | 2.1         | 1.8        |     |            | 2.4        |      |      | keto-hydroxyglutarate-aldolase                                |
| <i>galP</i>  | -3.7        | -4.0       |     | -3.0       | -3.0       | -2.4 | -2.5 | glycoside-pentoside-hexuronide (GPH):cation symporter         |
| <i>lacZ</i>  | -3.1        | -3.5       |     | -3.4       | -2.8       | -2.4 | -3.1 | beta-D-galactosidase                                          |
| <i>malE</i>  |             |            |     |            |            |      | -5.4 | maltose ABC transporter substrate binding protein             |
| <i>malF</i>  |             |            |     |            |            |      | -5.3 | maltose ABC transporter permease                              |
| <i>malG</i>  |             |            |     |            |            |      | -4.5 | maltose ABC transporter permease                              |
| <i>malQ</i>  |             |            | 1.6 |            | <b>1.3</b> |      |      | 4-alpha-glucanotransferase                                    |
| <i>mtlF</i>  | <b>1.4</b>  |            |     |            | 1.6        |      |      | PTS system mannitol-specific transporter subunit IIA          |
| <i>nagA</i>  | -1.5        |            |     |            |            |      |      | N-acetylglucosamine-6-phosphate deacetylase                   |
| <i>ptbA</i>  |             |            |     |            |            |      | -1.6 | PTS system beta-glucoside-specific transporter subunit IIAABC |
| <i>rpiA</i>  | 2.0         |            | 1.7 |            |            |      | 2.1  | ribose-5-phosphate isomerase A                                |
| <i>tagH</i>  | 1.6         | 1.6        |     |            | 1.9        |      |      | teichoic acid ABC transporter ATP binding protein             |
| <i>thgA</i>  | -2.9        | -3.0       |     | -3.0       | -2.4       | -2.0 | -2.4 | thiogalactoside acetyltransferase                             |
| <i>xylA</i>  |             |            | 2.0 |            |            |      |      | xylose isomerase                                              |
| <i>xylH</i>  | <b>-1.4</b> |            |     | -1.6       |            |      |      | 4-oxalocrotonate tautomerase                                  |
| <i>xylT</i>  | 2.1         | 2.1        |     | <b>1.3</b> |            | 2.4  |      | D-xylose proton-symporter                                     |
| <i>xynB</i>  | <b>1.4</b>  | <b>1.2</b> |     |            |            | 1.6  |      | beta-1,4-xylosidase                                           |
| <i>xynT</i>  |             | 1.6        |     |            |            | 2.1  |      | xyloside transporter                                          |
| <i>ycgC</i>  | 1.5         |            |     |            |            |      |      | hypothetical protein                                          |
| <i>yeeB</i>  | 2.1         |            |     |            |            |      |      | hydrolase                                                     |
| <i>yfbG</i>  |             | -5.4       |     |            |            |      |      | hypothetical protein                                          |
| <i>yhgD</i>  | 2.7         | 2.6        |     | <b>1.4</b> |            | 3.2  |      | hypothetical protein                                          |
| <i>yhgE</i>  | 4.1         | 3.7        |     | 2.3        |            | 4.0  |      | hypothetical protein                                          |
| <i>yoiC</i>  | <b>1.4</b>  |            |     |            |            | 1.6  |      | hypothetical protein                                          |
| <i>ypcA</i>  |             | 2.3        |     |            |            | 2.4  |      | P-beta-glucosidase                                            |
| <i>ypcC</i>  |             | -1.6       |     |            |            |      |      | hypothetical protein                                          |



|             |     |      |      |      |      |     |      |                                                                |
|-------------|-----|------|------|------|------|-----|------|----------------------------------------------------------------|
| <i>ypcD</i> |     |      | -1.6 |      |      |     |      | endo-beta-N-acetylglucosaminidase                              |
| <i>ypjA</i> | 1.9 | 1.5  | 1.7  | 2.4  |      | 1.4 |      | dehydrogenase                                                  |
| <i>yqgE</i> | 1.4 | 1.4  | 1.8  | 1.5  |      |     |      | transporter                                                    |
| <i>yqhA</i> |     |      | -1.7 | -1.2 |      |     |      | hypothetical protein   aldose-1-epimerase                      |
| <i>yvdD</i> |     |      | 1.5  |      |      |     |      | transporter                                                    |
| <i>yxdE</i> |     | 1.6  |      |      |      |     |      | oxidoreductase                                                 |
| <i>yxdG</i> |     | 2.6  | 2.7  | 2.7  | 1.9  | 2.0 | 3.3  | transporter                                                    |
| <i>yxfA</i> |     |      |      |      |      |     | -1.7 | transporter                                                    |
| <i>apbE</i> |     |      |      |      |      |     | -2.3 | thiamine biosynthesis lipoprotein                              |
| <i>hemH</i> |     |      |      | -1.7 |      |     |      | ferrochelatase protoheme ferro-lyase                           |
| <i>nadE</i> | 3.2 |      |      | 1.9  |      |     |      | NAD synthetase                                                 |
| <i>pabA</i> |     |      |      | -2.2 |      |     | -2.4 | para-aminobenzoate synthase component II folic acid            |
| <i>pabB</i> |     |      |      | -2.5 |      |     | -2.4 | para-aminobenzoate synthase component I folic acid             |
| <i>preA</i> |     | 1.5  | 1.5  |      | 1.9  |     |      | prenyl transferase                                             |
| <i>ribG</i> |     |      | 1.6  |      | 1.9  |     |      | riboflavin-specific deaminase riboflavin and cobalamin         |
| <i>accB</i> |     |      | -1.2 |      |      |     | 2.4  | acetyl-CoA carboxylase biotin carboxyl carrier protein subunit |
| <i>accC</i> |     |      |      |      |      |     | 1.7  | acetyl-CoA carboxylase biotin carboxylase subunit              |
| <i>accD</i> |     |      |      |      |      |     | 1.6  | acetyl-CoA carboxylase subunit beta                            |
| <i>acpD</i> |     | -1.5 | -1.9 |      |      |     |      | ACP phosphodiesterase                                          |
| <i>butA</i> | 1.3 |      |      | 1.5  |      |     |      | acetoin reductase fermentation                                 |
| <i>fabD</i> |     |      |      |      |      |     | 2.3  | ACP S-malonyltransferase                                       |
| <i>fabI</i> |     |      | 1.7  |      |      |     |      | enoyl-ACP reductase                                            |
| <i>fabZ</i> |     |      |      |      |      |     | 2.2  | (3R)-hydroxymyristoyl-ACP dehydratase                          |
| <i>fadD</i> |     |      |      | -5.9 |      |     | 2.1  | long-chain acyl-CoA synthetase                                 |
| <i>yfbB</i> |     |      | -7.2 |      | -1.8 |     | -2.4 | hypothetical protein                                           |
| <i>ygbB</i> |     | 1.7  | 2.2  | 1.7  | 1.5  |     |      | hypothetical protein                                           |
| <i>yqaG</i> |     | -1.2 | -2.7 | -1.5 |      |     |      | hypothetical protein                                           |
| <i>yveB</i> |     | 1.4  |      |      |      |     | 1.6  | hypothetical protein                                           |
| <i>yveH</i> |     | 1.4  | 4.0  |      |      |     | 1.6  | hypothetical protein                                           |

|              |            |            |             |      |            |      |                                                                                |
|--------------|------------|------------|-------------|------|------------|------|--------------------------------------------------------------------------------|
| <i>aldR</i>  | 1.5        |            |             |      |            |      | AldR regulatory protein                                                        |
| <i>rluC</i>  |            |            |             |      |            | 1.7  | pseudouridine synthase                                                         |
| <i>truB</i>  |            |            | <b>-1.4</b> |      | -1.6       |      | tRNA pseudouridine synthase B                                                  |
| <i>yabC</i>  | 1.8        |            |             |      |            |      | hypothetical protein                                                           |
| <i>ybiD</i>  | <b>1.3</b> |            | 1.5         |      |            |      | ribosomal RNA large subunit methyltransferase                                  |
| <i>ygdA</i>  |            | 1.6        | 1.9         |      | <b>1.2</b> | 1.7  | hypothetical protein                                                           |
| <i>ynjI</i>  | 1.9        |            |             | 1.7  | 1.6        |      | hypothetical protein                                                           |
| <i>ynjJ</i>  | 2.3        | <b>1.4</b> | <b>1.4</b>  | 1.6  | <b>1.5</b> |      | hypothetical protein                                                           |
| <i>ywfF</i>  | -1.7       |            |             |      |            |      | hypothetical protein                                                           |
| <i>ywfG</i>  | 2.4        | <b>1.2</b> | 2.5         |      | <b>1.3</b> |      | hypothetical protein                                                           |
| <i>adaA</i>  |            |            |             |      | 1.9        |      | methylphosphotriester-DNA alkyltransferase                                     |
| <i>cspD</i>  |            |            | -6.1        |      |            |      | cold shock protein D                                                           |
| <i>cspE</i>  |            |            | 1.6         |      |            |      | cold shock protein E                                                           |
| <i>dhaK</i>  |            |            | 2.0         |      | 2.3        | 1.9  | dhaKLM operon coactivator, dihydroxyacetone utilization pathway                |
| <i>fur</i>   | 2.2        |            |             |      |            |      | ferric uptake regulator                                                        |
| <i>gadR</i>  |            | -2.2       |             |      | -1.9       |      | positive regulator                                                             |
| <i>hrcA</i>  | 1.6        |            |             |      |            |      | heat-inducible transcription repressor                                         |
| <i>fruR</i>  |            |            | 1.641       |      |            |      | DeoR family transcription regulator of fructose utilization pathway            |
| <i>nadR</i>  | 2.1        | <b>1.5</b> | 1.7         |      |            |      | NadR family transcription regulator, NAD cellular biosynthesis pathway         |
| <i>phoU</i>  | 2.1        |            | <b>1.3</b>  |      |            |      | phosphate transport system regulator                                           |
| <i>rcfB</i>  |            |            | 1.8         |      |            |      | CRP/FNR family transcription regulator involved in pH homeostasis              |
| <i>rliA</i>  |            | 1.6        |             |      |            | 1.9  | transcriptional regulator LacI-family regulators, putative regulatory function |
| <i>rliDB</i> |            | 3.0        | 2.3         | 3.2  | 2.1        | 3.3  | transcriptional regulator LacI-family regulators, putative regulatory function |
| <i>rlrA</i>  |            |            |             |      |            | -1.6 | LysR-family transcription regulator, putative regulatory function              |
| <i>rmaA</i>  |            | -1.6       | <b>-1.2</b> | -1.6 |            |      | MarR family transcriptional regulator of fatty acid biosynthesis pathway       |
| <i>rmaG</i>  |            | -2.1       |             |      |            |      | MarR family transcriptional regulator of fatty acid biosynthesis pathway       |
| <i>rmaJ</i>  | -1.6       |            |             |      |            |      | MarR-family transcriptional regulator of hyaluronan biosynthesis pathway       |

|              |      |             |             |      |                       |                                                                                                 |
|--------------|------|-------------|-------------|------|-----------------------|-------------------------------------------------------------------------------------------------|
| <i>rpoD</i>  | 1.8  |             |             |      |                       | RNA polymerase sigma factor RpoD                                                                |
| <i>sigX</i>  |      |             |             | 1.6  |                       | RNA polymerase ECF sigma factor                                                                 |
| <i>tagR</i>  |      | <b>1.5</b>  |             | 1.9  |                       | transcriptional regulator similar to EpsR, possibly involved in exopolysaccharides biosynthesis |
| <i>yabA</i>  |      |             |             |      |                       | transcriptional regulator belongs to the PBSX(XRE) family of transcription regulators           |
| <i>ybaI</i>  | -1.8 |             |             |      |                       | glycosyl transferase glycosyltransferase family 2                                               |
| <i>ybeF</i>  |      | 1.7         | 2.0         | 1.9  | 2.3                   | hypothetical protein                                                                            |
| <i>yfeA</i>  |      | 1.6         | <b>1.5</b>  | 2.1  |                       | RpiR family of transcription regulator, putative regulatory function                            |
| <i>ygfC</i>  |      | -2.9        |             | -4.8 |                       | TetR/AcrR family transcription regulator of heme homeostasis process                            |
| <i>yjaB</i>  | 2.5  |             |             |      |                       | transcriptional regulator, LytR family, putative regulatory function                            |
| <i>yjaJ</i>  |      | 1.6         |             |      |                       | transcriptional regulator, LytR family, putative regulatory function                            |
| <i>ykhD</i>  |      |             | 1.8         |      |                       | redox-sensing transcriptional repressor Rex                                                     |
| <i>yliA</i>  | 2.0  |             | <b>1.3</b>  |      | <b>1.4</b>            | positive transcription regulator                                                                |
| <i>ynaA</i>  | 2.2  |             | <b>-1.5</b> |      |                       | transcriptional regulator, heat and DNA damage induction                                        |
| <i>ynaB</i>  | 2.2  |             |             |      | 1.5                   | transcriptional regulator, putative regulatory function                                         |
| <i>ynaE</i>  |      |             | 1.6         |      |                       | hypothetical protein, putative regulatory function                                              |
| <i>yogM</i>  |      | 1.6         | 1.6         |      | <b>1.4</b> <b>1.3</b> | hypothetical protein                                                                            |
| <i>yohC</i>  |      |             |             | 1.6  |                       | TetR/AcrR family transcription regulator, putative regulatory function                          |
| <i>yqfA</i>  |      | <b>-1.4</b> | -1.7        |      | <b>-1.4</b>           | hypothetical protein                                                                            |
| <i>yrfA</i>  | 1.5  |             | <b>1.4</b>  |      |                       | ArsR family transcription regulator, putative regulatory function                               |
| <i>yrfE</i>  |      | -1.6        |             |      |                       | LytR family transcriptional regulator, putative regulatory function                             |
| <i>glcR</i>  |      | -1.8        |             | -1.7 | <b>-1.3</b>           | RpiR family transcription regulator of galactose utilization Leloir pathway                     |
| <i>ywjD</i>  |      | -1.7        |             | -1.7 | <b>-1.4</b> -1.8      | PBSX(XRE) family transcription regulator, putative regulatory function                          |
| <i>yxbF</i>  |      | -2.2        |             | 2.4  |                       | hypothetical protein                                                                            |
| <i>comEA</i> |      | 1.6         |             |      |                       | hypothetical protein competence protein                                                         |
| <i>dinG</i>  |      | <b>-1.3</b> |             | -1.5 | <b>-1.4</b>           | DinG ATP-dependent helicase                                                                     |
| <i>dinP</i>  |      | <b>1.2</b>  |             | 1.6  | 1.7                   | DNA polymerase IV                                                                               |
| <i>hslB</i>  | 2.5  |             |             |      | 2.3                   | HU-like DNA-binding protein                                                                     |

|             |      |             |             |            |             |            |             |                                     |                                                        |
|-------------|------|-------------|-------------|------------|-------------|------------|-------------|-------------------------------------|--------------------------------------------------------|
| <i>recJ</i> | -1.6 |             |             |            |             |            |             | ssDNA-specific exonuclease RecJ     |                                                        |
| <i>recX</i> | 1.7  |             | <b>1.4</b>  |            |             |            |             | recombination regulator RecX        |                                                        |
| <i>ssbA</i> |      |             | 3.1         |            | 1.6         |            |             | single-stranded DNA-binding protein |                                                        |
| <i>xerD</i> |      | 1.5         |             |            | <b>1.4</b>  |            |             | integrase-recombinase               |                                                        |
| <i>yajF</i> |      | <b>1.4</b>  | 2.4         | <b>1.2</b> |             | 1.7        |             | hypothetical protein                |                                                        |
| <i>yjaF</i> | 2.4  |             |             |            |             |            |             | hypothetical protein                |                                                        |
| <i>yneB</i> |      | <b>1.2</b>  | <b>1.3</b>  | 1.8        |             | <b>1.3</b> |             | hypothetical protein                |                                                        |
| <i>dapA</i> | 1.6  |             |             |            |             |            |             | dihydrodipicolinate synthase        |                                                        |
| <i>dltB</i> | 2.8  | -1.7        |             | 2.1        |             | -1.6       | -1.7        | -2.4                                | peptidoglycan biosynthesis protein                     |
| <i>dltD</i> | 4.1  | -1.6        |             | 3.6        |             |            | <b>-1.3</b> |                                     | peptidoglycan biosynthesis protein                     |
| <i>glmS</i> | 1.8  |             |             |            | <b>1.4</b>  |            |             |                                     | glucosamine--fructose-6-phosphate aminotransferase     |
| <i>mscL</i> | 1.8  |             |             |            |             |            |             |                                     | large-conductance mechanosensitive channel             |
| <i>murB</i> | 1.5  |             | 1.9         |            |             |            |             |                                     | UDP-N-acetylenolpyruvoylglucosamine reductase          |
| <i>murQ</i> |      | -1.8        | <b>-1.5</b> |            |             |            | -1.6        |                                     | N-acetylmuramic acid 6-phosphate etherase              |
| <i>plpA</i> | -2.8 | -2.2        | -1.6        | -3.0       | -1.8        | -1.6       | -2.5        |                                     | outer membrane lipoprotein                             |
| <i>plpB</i> |      | <b>-1.4</b> | <b>-1.2</b> | -2.1       | <b>-1.5</b> |            | -1.7        |                                     | outer membrane lipoprotein                             |
| <i>plpC</i> | -2.2 | -1.6        | <b>-1.4</b> | -2.4       | <b>-1.3</b> |            | -1.8        |                                     | outer membrane lipoprotein                             |
| <i>ptk</i>  | 2.7  | <b>1.5</b>  |             | 1.9        |             |            |             |                                     | phosphoketolase                                        |
| <i>tagL</i> |      | 2.0         | <b>1.2</b>  |            |             |            | <b>1.3</b>  |                                     | exopolysaccharide biosynthesis protein                 |
| <i>ycbH</i> | -1.6 |             |             |            |             |            |             |                                     | sugar transferase                                      |
| <i>ycbI</i> | -1.7 |             |             |            |             |            |             |                                     | sugar transferase                                      |
| <i>ycbK</i> | -1.7 |             |             |            |             |            |             |                                     | polysaccharide biosynthesis export protein             |
| <i>yfbI</i> |      |             | -7.6        |            |             |            |             |                                     | hypothetical protein                                   |
| <i>yfbJ</i> |      |             | -7.2        |            |             |            |             |                                     | hypothetical protein                                   |
| <i>yijB</i> |      |             | 1.7         |            |             |            |             |                                     | hypothetical protein                                   |
| <i>yijC</i> |      |             | 1.7         |            |             |            |             |                                     | ABC transporter permease transport and binding protein |
| <i>yijH</i> | 1.8  |             |             |            |             |            |             |                                     | hypothetical protein                                   |
| <i>ymjE</i> | 1.5  |             |             |            |             |            |             |                                     | glycosyl transferase family protein                    |
| <i>yncA</i> |      |             | <b>1.3</b>  | 1.7        |             |            |             |                                     | acetyltransferase                                      |

|              |     |     |      |      |      |      |                                                                                  |                                                                 |
|--------------|-----|-----|------|------|------|------|----------------------------------------------------------------------------------|-----------------------------------------------------------------|
| <i>ynfC</i>  | 1.5 | 1.5 | 1.5  |      |      |      | hypothetical protein                                                             |                                                                 |
| <i>ytbA</i>  |     | 1.6 | 1.3  | 1.2  | 2.1  |      | hypothetical protein                                                             |                                                                 |
| <i>ytjA</i>  | 1.8 |     | 1.2  |      |      |      | hypothetical protein                                                             |                                                                 |
| <i>clpE</i>  | 2.4 | 1.2 | 1.5  |      |      |      | ATP-dependent protease                                                           |                                                                 |
| <i>gpo</i>   | 1.8 |     |      |      |      |      | glutathione peroxidase thioredoxin, glutaredoxin, and glutathione                |                                                                 |
| <i>groES</i> | 2.8 |     |      |      |      |      | co-chaperonin GroES 10 kDa chaperonin                                            |                                                                 |
| <i>osmC</i>  | 2.5 |     | 1.5  |      |      |      | osmotically inducible protein                                                    |                                                                 |
| <i>pmsX</i>  | 2.0 |     |      |      |      |      | peptide methionine sulfoxide reductase t                                         |                                                                 |
| <i>sugE</i>  |     | 1.8 | 2.3  | 2.2  | 1.3  | 1.3  | SugE protein chaperones                                                          |                                                                 |
| <i>ybjA</i>  | 1.9 |     | 1.4  |      |      |      | methionine sulfoxide reductase B                                                 |                                                                 |
| <i>yfcF</i>  |     | 2.0 | 1.5  | 2.0  | 1.3  | 1.9  | hypothetical protein                                                             |                                                                 |
| <i>ynhC</i>  | 1.5 |     |      |      |      |      | hypothetical protein                                                             |                                                                 |
| <i>ynhD</i>  |     | 1.7 |      |      |      |      | hypothetical protein                                                             |                                                                 |
| <i>amtB</i>  |     |     |      | 1.9  | -1.7 | -2.2 | ammonium transporter                                                             |                                                                 |
| <i>busAB</i> |     |     |      | 1.8  |      |      | betaine ABC transporter permease and substrate binding protein                   |                                                                 |
| <i>cadA</i>  | 2.3 |     | 3.7  |      | 2.4  |      | cadmium efflux ATPase transort and binding protein                               |                                                                 |
| <i>cbiO</i>  |     |     | 2.6  |      | 3.2  |      | cobalt transporter ATP-binding subunit                                           |                                                                 |
| <i>feoA</i>  |     |     |      |      |      | 1.5  | ferrous ion transport protein A                                                  |                                                                 |
| <i>mtsA</i>  |     |     | -3.2 |      | -3.7 | -3.6 | manganese ABC importer                                                           |                                                                 |
| <i>mtsB</i>  |     |     | -2.0 |      | -2.7 |      | manganese ABC importer                                                           |                                                                 |
| <i>mtsC</i>  |     |     | -2.0 |      | -2.6 | -3.8 | manganese ABC importer permease                                                  |                                                                 |
| <i>pacL</i>  |     |     | 2.3  |      | 2.4  |      | magnesium-transporting ATPase                                                    |                                                                 |
| <i>pstF</i>  | 1.5 |     |      |      |      |      | phosphate ABC transporter substrate-binding protein                              |                                                                 |
| <i>yafB</i>  |     | 2.1 | 1.6  | 2.7  | 2.6  |      | sulfate permease, MFS superfamily                                                |                                                                 |
| <i>ybcC</i>  |     | 1.8 | 1.7  |      | 1.7  |      | MATE family efflux transporter                                                   |                                                                 |
| <i>yceA</i>  |     | 1.6 |      |      | 1.6  |      | hypothetical protein                                                             |                                                                 |
| <i>ydiF</i>  |     | 1.3 |      | 1.7  | 1.2  |      | Na <sup>+</sup> /H <sup>+</sup> antiporter transort and binding protein, cations |                                                                 |
| <i>ygfE</i>  |     |     | 1.8  | -5.7 | -1.9 | -2.7 | 2.0                                                                              | magnesium importer and exporter                                 |
| <i>yjdJ</i>  |     | 1.7 | 1.5  | 2.1  |      | 1.8  |                                                                                  | potassium channel protein transort and binding protein, cations |

|                |             |            |     |             |             |                                                       |
|----------------|-------------|------------|-----|-------------|-------------|-------------------------------------------------------|
| <i>ymgF</i>    | 1.9         |            |     | 1.6         |             | hypothetical protein                                  |
| <i>ynjC</i>    | <b>1.4</b>  |            |     |             | 1.6         | hypothetical protein                                  |
| <i>ynjE</i>    | 1.9         | 1.5        |     |             | 1.6         | hypothetical protein                                  |
| <i>ynjF</i>    |             |            |     | <b>1.3</b>  | 1.6         | hypothetical protein                                  |
| <i>yphB</i>    | 1.8         | <b>1.3</b> |     | <b>1.3</b>  | 2.1         | magnesium transporter transport and binding protein   |
| <i>ytgB</i>    | 2.3         |            |     | 2.0         |             | cesium ABC transporter substrate binding protein      |
| <i>yuhE</i>    | 2.5         |            |     | 1.5         | 1.8         | copper homeostasis protein                            |
| <i>yvfA</i>    | 1.5         |            |     |             | <b>1.5</b>  | metal ABC transporter substrate binding protein       |
| <i>aldC</i>    |             | 2.0        |     |             |             | alpha-acetolactate decarboxylase fermentation         |
| <i>dltA</i>    | 3.0         |            |     | 2.1         | <b>-1.3</b> | D-alanine--poly(phosphoribitol) ligase subunit 1      |
| <i>dltC</i>    | -1.9        |            |     | 2.2         | -1.8        | -2.2 D-alanine--poly(phosphoribitol) ligase subunit 2 |
| <i>fabG2</i>   | 2.1         | 1.9        | 2.1 | 1.6         | 2.6         | 3-oxoacyl-ACP reductase                               |
| <i>yoaI</i>    |             |            |     | 1.6         |             | hypothetical protein                                  |
| <i>yrbC</i>    | <b>1.3</b>  |            |     |             | 1.8         | 1,4-dihydroxy-2-naphthoate octaprenyltransferase      |
| <i>yrbE</i>    | <b>1.4</b>  | 1.6        |     |             | 2.0         | hypothetical protein                                  |
| <i>comEC</i>   | 1.9         | 1.9        |     |             | 2.4         | hypothetical protein competence protein               |
| <i>yhhD</i>    | 2.0         | 1.7        |     | 1.5         | 2.6         | hypothetical protein                                  |
| <i>ysbA</i>    | <b>-1.2</b> | 1.6        |     |             | 1.6         | hypothetical protein                                  |
| <i>ysbD</i>    | -2.2        |            |     | <b>-1.3</b> | <b>-1.3</b> | -1.8 <b>-1.5</b> hypothetical protein                 |
| <i>ythC</i>    |             | 2.4        |     |             |             | hypothetical protein                                  |
| <i>L200065</i> | <b>1.2</b>  |            |     |             | 2.3         | 1.7 hypothetical protein                              |
| <i>yafJ</i>    | 1.6         | <b>1.3</b> |     |             | 2.0         | hypothetical protein                                  |
| <i>yaiB</i>    | 1.7         |            |     | 1.7         | 2.0         | hypothetical protein                                  |
| <i>yaiH</i>    |             | 1.7        |     | 1.6         | 1.7         | hypothetical protein                                  |
| <i>yaiI</i>    | 2.4         | 2.0        |     | <b>1.2</b>  | 2.4         | hypothetical protein                                  |
| <i>yaiJ</i>    | 2.6         | 2.2        |     | 1.8         | 3.2         | hypothetical protein                                  |
| <i>ybeH</i>    |             |            |     | 2.3         | 1.9         | hypothetical protein                                  |
| <i>ybfC</i>    | <b>1.4</b>  | 2.0        |     |             |             | hypothetical protein                                  |
| <i>ybgA</i>    | 1.6         | 1.8        |     |             |             | hypothetical protein                                  |

|             |      |             |             |            |             |                      |
|-------------|------|-------------|-------------|------------|-------------|----------------------|
| <i>ycdA</i> |      | 1.6         |             |            |             | hypothetical protein |
| <i>yciF</i> | 1.5  |             |             |            |             | hypothetical protein |
| <i>yciG</i> | 1.8  | <b>1.4</b>  | 2.1         |            | 2.3         | hypothetical protein |
| <i>ydbD</i> |      |             |             |            | 1.5         | hypothetical protein |
| <i>yeiD</i> | 2.2  | <b>-1.3</b> |             |            | -2.3        | hypothetical protein |
| <i>yfbK</i> |      | <b>-1.5</b> | -3.5        |            | -2.1        | hypothetical protein |
| <i>yfiH</i> | -1.8 |             |             |            |             | hypothetical protein |
| <i>yfiI</i> | -2.0 |             | <b>-1.3</b> |            |             | hypothetical protein |
| <i>ygaD</i> | -1.8 |             |             |            |             | hypothetical protein |
| <i>ygeB</i> |      |             | <b>-1.2</b> | -1.6       | -2.1        | hypothetical protein |
| <i>ygeC</i> | -2.1 |             | <b>-1.3</b> |            | <b>-1.2</b> | hypothetical protein |
| <i>yghB</i> |      |             |             | 1.5        |             | hypothetical protein |
| <i>yhhA</i> | 1.8  | <b>1.4</b>  |             |            | 2.3         | hypothetical protein |
| <i>yhhB</i> |      |             |             |            | 1.7         | hypothetical protein |
| <i>yhhC</i> |      | <b>1.3</b>  | 2.6         |            | <b>1.5</b>  | hypothetical protein |
| <i>yhjA</i> | 4.3  |             | 2.1         | 1.9        | 2.5         | hypothetical protein |
| <i>yhjE</i> |      |             |             |            | -1.7        | hypothetical protein |
| <i>yiaC</i> | -1.8 |             |             |            |             | hypothetical protein |
| <i>yiiD</i> |      |             | 2.1         |            |             | hypothetical protein |
| <i>yjdI</i> | 2.0  | <b>1.5</b>  |             |            | 1.8         | hypothetical protein |
| <i>yjff</i> | 1.6  |             |             |            |             | hypothetical protein |
| <i>ykbC</i> | 1.8  | <b>1.4</b>  |             |            | 2.2         | hypothetical protein |
| <i>ykbD</i> | 1.9  | 1.5         |             |            | 1.9         | hypothetical protein |
| <i>ykbE</i> |      |             | 1.6         |            |             | hypothetical protein |
| <i>ykcE</i> | 2.0  |             |             |            |             | hypothetical protein |
| <i>yklI</i> | -2.0 |             |             |            | -2.3        | hypothetical protein |
| <i>ylhB</i> |      | 2.5         |             | <b>1.2</b> |             | hypothetical protein |
| <i>yliD</i> | 2.5  | 1.9         | <b>1.4</b>  |            | 2.6         | hypothetical protein |
| <i>ymbC</i> |      | 1.7         | 2.0         | 1.9        | 1.9         | hypothetical protein |

|             |             |            |            |             |            |                                         |                      |
|-------------|-------------|------------|------------|-------------|------------|-----------------------------------------|----------------------|
| <i>ymbD</i> | 2.3         | 2.0        | 2.1        |             | 2.6        | hypothetical protein                    |                      |
| <i>ymbH</i> | 1.7         | <b>1.3</b> |            |             | 1.8        | hypothetical protein, putative protease |                      |
| <i>ymcA</i> | 1.6         | <b>1.2</b> |            |             | 2.1        | hypothetical protein                    |                      |
| <i>ymcB</i> | 2.0         | <b>1.5</b> | <b>1.3</b> |             | 2.0        | hypothetical protein                    |                      |
| <i>ymcC</i> | 2.2         |            |            |             | 1.6        | hypothetical protein                    |                      |
| <i>ymeA</i> | 2.6         | 2.5        | 1.8        |             | 3.2        | hypothetical protein                    |                      |
| <i>ymhG</i> | <b>1.3</b>  |            |            |             | 1.8        | hypothetical protein                    |                      |
| <i>yndE</i> | 1.7         |            |            |             | <b>1.4</b> | hypothetical protein                    |                      |
| <i>yneC</i> | 4.0         | 2.4        | 3.1        |             | <b>1.3</b> | hypothetical protein                    |                      |
| <i>yneG</i> |             | 2.6        |            |             |            | hypothetical protein                    |                      |
| <i>ynfH</i> | 2.4         |            | 2.7        | 2.9         | 1.9        | 2.1                                     | hypothetical protein |
| <i>ynhA</i> |             |            |            | <b>-1.3</b> |            | -2.8                                    | hypothetical protein |
| <i>yniC</i> | <b>-1.3</b> |            |            | -1.6        |            |                                         | hypothetical protein |
| <i>yniJ</i> | 1.7         | <b>1.3</b> | 1.7        |             |            | 2.1                                     | hypothetical protein |
| <i>yofM</i> | -2.0        |            |            |             |            | -1.8                                    | DNA-binding protein  |
| <i>yohD</i> | 1.7         |            |            |             |            |                                         | hypothetical protein |
| <i>ypaG</i> |             |            | 1.6        |             |            |                                         | hypothetical protein |
| <i>ypiH</i> |             |            |            |             | 1.7        |                                         | hypothetical protein |
| <i>ypiJ</i> | <b>1.2</b>  |            |            |             | 1.8        |                                         | hypothetical protein |
| <i>ypiL</i> | <b>1.2</b>  | <b>1.3</b> | 1.5        |             | <b>1.3</b> |                                         | hypothetical protein |
| <i>yqbI</i> | <b>1.5</b>  | 1.6        |            |             | 2.0        |                                         | hypothetical protein |
| <i>yraE</i> |             |            | <b>1.3</b> |             | 1.6        |                                         | hypothetical protein |
| <i>yrbB</i> |             |            |            | -1.7        |            |                                         | hypothetical protein |
| <i>yrbH</i> | 1.8         | 1.6        |            |             | 2.6        |                                         | hypothetical protein |
| <i>yreB</i> | -1.6        |            |            |             |            | <b>-1.2</b>                             | hypothetical protein |
| <i>yreD</i> | 3.7         |            |            |             | 3.9        | 3.8                                     | hypothetical protein |
| <i>yseD</i> | 2.0         | <b>1.4</b> | 2.0        |             | 2.3        |                                         | hypothetical protein |
| <i>ysjF</i> | 1.8         | <b>1.5</b> | 2.0        |             | 2.6        |                                         | hypothetical protein |
| <i>ytdD</i> | 3.3         | <b>1.4</b> | <b>1.4</b> |             |            |                                         | hypothetical protein |



|              |            |            |             |             |            |            |                                                                       |                                                                |
|--------------|------------|------------|-------------|-------------|------------|------------|-----------------------------------------------------------------------|----------------------------------------------------------------|
| <i>ytcD</i>  | 2.3        |            | <b>1.4</b>  |             |            | <b>1.5</b> | hypothetical protein                                                  |                                                                |
| <i>yuaE</i>  |            |            | <b>-1.3</b> | <b>-1.3</b> | -2.1       | -1.9       | hypothetical protein                                                  |                                                                |
| <i>yueC</i>  | 1.8        | 2.0        | 1.8         |             |            | 2.0        | hypothetical protein                                                  |                                                                |
| <i>yuhC</i>  | 1.5        |            | <b>1.3</b>  |             |            |            | hypothetical protein                                                  |                                                                |
| <i>yujF</i>  |            | 2.4        | 1.9         |             | <b>1.3</b> | 2.3        | hypothetical protein                                                  |                                                                |
| <i>yviJ</i>  |            | 2.0        | 1.8         | 2.9         |            |            | hypothetical protein                                                  |                                                                |
| <i>ycxD</i>  | <b>1.3</b> |            | 1.9         | <b>1.4</b>  |            | 1.5        | hypothetical protein                                                  |                                                                |
| <i>floL</i>  | 1.6        |            | <b>1.3</b>  |             |            |            | flotillin-like protein                                                |                                                                |
| <i>kinA</i>  |            | <b>1.4</b> |             | -1.7        |            |            | sensor protein kinase                                                 |                                                                |
| <i>kinB</i>  | 1.7        |            | <b>1.4</b>  | <b>1.2</b>  |            | <b>1.3</b> | sensor protein kinase                                                 |                                                                |
| <i>llrA</i>  | 1.7        |            |             |             |            |            | two-component system regulator                                        |                                                                |
| <i>ybdC</i>  | -2.1       |            |             | -1.5        |            |            | hypothetical protein                                                  |                                                                |
| <i>yfgF</i>  |            | <b>1.5</b> | <b>1.3</b>  |             |            | 2.0        | ABC transporter permease                                              |                                                                |
| <i>yjjE</i>  | 2.6        |            |             |             |            |            | hypothetical protein                                                  |                                                                |
| <i>ythA</i>  | 1.9        | <b>1.2</b> | 3.3         |             |            | <b>1.3</b> | hypothetical protein                                                  |                                                                |
| <i>ythB</i>  |            |            | 2.8         |             |            | <b>1.2</b> | hypothetical protein                                                  |                                                                |
| <i>yudH</i>  |            | -1.7       |             |             |            |            | hypothetical protein dihydrofolate reductase                          |                                                                |
| <i>comC</i>  |            | <b>1.4</b> | <b>1.2</b>  |             |            | 2.0        | type 4 prepilin-like protein specific leader peptidase transformation |                                                                |
| <i>comGA</i> |            | 2.6        | 2.6         |             | <b>1.4</b> | 2.8        | protein ComGA competence protein                                      |                                                                |
| <i>comGB</i> |            | 2.5        | 1.8         |             |            | 2.6        | protein ComGB competence protein                                      |                                                                |
| <i>comGC</i> |            | 2.2        |             | 2.6         |            | 2.6        | protein ComGC competence protein                                      |                                                                |
| <i>comGD</i> |            | 2.7        | 1.7         |             | 1.5        | 1.9        | 1.6                                                                   | protein ComGD competence protein                               |
| <i>ftsY</i>  | 1.7        |            | 1.7         |             |            |            |                                                                       | hypothetical protein                                           |
| <i>lmrP</i>  | -1.9       |            |             | 2.5         | 1.5        |            | 1.8                                                                   | multidrug efflux MFS transporter                               |
| <i>ybdI</i>  |            |            |             |             | 1.6        | 1.7        | <b>1.4</b>                                                            | hypothetical protein                                           |
| <i>ybfD</i>  |            | 1.6        |             | 2.4         |            |            | 1.9                                                                   | transporter transport and binding protein                      |
| <i>yjfF</i>  |            | <b>1.4</b> | <b>1.5</b>  | 2.7         |            |            | 1.9                                                                   | membrane-bound transport protein transport and binding protein |
| <i>ygfA</i>  |            |            |             | -2.8        |            |            |                                                                       | ABC transporter ATP-binding protein                            |
| <i>ygfB</i>  |            |            |             | -4.8        |            |            |                                                                       | ABC transporter permease                                       |



|                 |            |             |      |             |            |            |             |                                                  |
|-----------------|------------|-------------|------|-------------|------------|------------|-------------|--------------------------------------------------|
| <i>L200055</i>  | -6.9       | -1.7        | -2.2 |             | -2.2       | -2.4       |             | hypothetical protein                             |
| <i>L200056</i>  | -2.4       | -2.0        | -1.8 | <b>-1.3</b> | -2.2       | -2.2       | <b>-1.3</b> | hypothetical protein                             |
| <i>L200058</i>  | -3.3       | <b>-1.5</b> | -2.0 | <b>-1.5</b> |            | -2.5       |             | hypothetical protein                             |
| <i>L200071</i>  | 1.6        | <b>1.3</b>  |      |             |            |            |             | hypothetical protein                             |
| <i>L200072</i>  | 1.9        | 1.9         |      |             |            | 1.8        |             | hypothetical protein                             |
| <i>L200073</i>  | 2.4        | 2.2         |      | 1.8         |            | 2.7        |             | hypothetical protein                             |
| <i>L200074</i>  | 3.6        | 3.3         |      | 1.9         |            | 4.5        |             | hypothetical protein                             |
| <i>L200075</i>  |            |             |      |             |            | 2.3        |             | hypothetical protein                             |
| <i>L200077</i>  | -3.4       | -3.7        |      | -3.1        | -2.8       | -2.7       | -2.7        | hypothetical protein                             |
| <i>L200079</i>  |            |             | 1.7  |             |            |            |             | hypothetical protein                             |
| <i>tra1077B</i> | 1.7        |             |      |             |            | 1.8        |             | IS1077B transposase                              |
| <i>tra904A</i>  | 2.4        | <b>1.4</b>  |      |             |            | 2.9        |             | transposase of IS904A                            |
| <i>tra904B</i>  | 2.2        | <b>1.3</b>  |      |             |            | 2.7        | 1.9         | transposase of IS904B                            |
| <i>tra904D</i>  | 2.2        | <b>1.4</b>  |      |             |            | 2.7        |             | transposase of IS904D                            |
| <i>tra904E</i>  | <b>1.3</b> |             |      |             | <b>1.2</b> |            | 1.9         | transposase of IS904E                            |
| <i>tra981A</i>  |            |             | 2.0  |             | <b>1.5</b> | 1.5        |             | transposase of IS981A                            |
| <i>tra981E</i>  |            |             | 2.0  |             | <b>1.4</b> | <b>1.3</b> |             | transposase of IS981E                            |
| <i>tra981G</i>  |            |             | 1.9  |             | <b>1.3</b> | <b>1.2</b> |             | transposase of IS981G                            |
| <i>yafI</i>     | <b>1.5</b> |             |      |             | 1.6        | 1.8        | 2.1         | hypothetical protein transposon related function |
| <i>yajA</i>     | 1.7        | 1.9         |      |             |            | 1.7        |             | transposase                                      |
| <i>yajE</i>     |            |             | 1.5  |             |            |            | <b>1.3</b>  | transposase                                      |
| <i>yajG</i>     |            |             | 2.2  |             | <b>1.3</b> | <b>1.2</b> | <b>1.4</b>  | transposase                                      |
| <i>ybdL</i>     | 1.6        |             |      |             |            |            |             | hypothetical protein transposon related function |
| <i>ydhD</i>     | <b>1.4</b> | 2.8         |      |             | 1.6        | 1.8        | 2.1         | hypothetical protein transposon related function |
| <i>ygcE</i>     | 1.6        |             |      |             |            |            |             | hypothetical protein transposon related function |
| <i>yidF</i>     | 1.5        |             |      |             | 1.7        | 1.8        | 2.3         | hypothetical protein transposon related function |
| <i>ymbI</i>     |            |             | 1.5  |             |            |            | <b>1.4</b>  | transposase                                      |
| <i>ymhB</i>     |            |             | 1.5  |             |            |            | <b>1.4</b>  | transposase                                      |

**Table S3. Primers used in this study.** Primers were designed on the basis of the *L. lactis* IL594 plasmid nucleotide sequences (NCBI accession no. HM021326, HM021327, HM021328, HM021329, HM021330, HM021331, and HM197723; <http://www.ncbi.nlm.nih.gov>)

| Strain or primer pair | Genotypic characteristics                               |
|-----------------------|---------------------------------------------------------|
| p1orf3zF / p1orf3zR   | CTTGCTGACGAATTAGGAGTTAG/TCAGCGGTTAATAGCTTCATAC          |
| p1orf6zF / p1orf6zR   | CCTTGTTTCGTTGGATTGATTAG/AGAACTCGCTTCTAAATTTGTG          |
| p2citRzF / p2citRzR   | AGGAGACAACAACATGAAAGTC/GAGCGTTTGTCTCCAATCTG             |
| p2orf2zF / p2orf2zR   | AGCTAAACAGACCGTTCAATAC/GTTTAGGACGATCGAACCAC             |
| p3orf2tF / p3orf2tR   | CAACAACAGAACGAAACACAAC/AAGTTCTGTTCTAAGAATACTGACG        |
| p3orf3zF / p3orf3zR   | TCTCAGGTGTTTATCTGGTATTTG/GACAACAAGTCCTACTCCAAAG         |
| p4or24zF / p4or24zR   | GTTTGATCTTACCTTGCTGTTG/GTTACTGGGAACCGATTACG             |
| p4or49zF / p4or49zR   | CCTTACCAATGGTGATGTAATCG/GTCAAAGATACTGGCGGTTTAG          |
| p5cadAzF / p5cadAzR   | GCATCGACGGTTGGTATTG/GTTTGGCGGCTAAGTCTAAC                |
| p5cadCzF / p5cadCzR   | GTTGATAGTCACAAGGATGGTAAG/AATTTACGCCAAGCTCCATAAG         |
| p6orf6zF / p6orf6zR   | TCAGGGAATTCCTTTATTAGGTTCTG/CTTGTTTCATCTACCTTAGTCAAGTATC |
| p6orf7zF / p6orf7zR   | GATATACTGCGACTCCAGTTG/ATTCTAATGCCACATGGTAAGG            |
| p7or11zF / p7or11zR   | ATCGAACCGCCAATCAAG/CCGTATTGATCCCAGAAGTAAG               |
| p7orfXzF / p7orfXzR   | TGCAGATGAGTTGAGTGTTAC/TGCTACCACTTTCTACTTTACC            |
